# Supplementary material for: Population genomics of Plasmodium malariae from 4 African countries
Source: JCI journal article supplement (doi:10.1172/jci.insight.196322), 2026-05-05
Supplement: sd1 [file 1]

## Supplemental Material

### Population Genomics of *Plasmodium malariae* from Four African Countries

Zachary R. Popkin-Hall<sup>1†</sup>, Kelly Carey-Ewend<sup>2†</sup>, Farhang Aghakhanian<sup>1</sup>, Eniyou C. Oriero<sup>3</sup>, Misago D. Seth<sup>4</sup>, Melchior M. Kashamuka<sup>5</sup>, Billy Ngalala<sup>6</sup>, Innocent M. Ali<sup>7</sup>, Eric Sompwe Mukomena<sup>8,9</sup>, Celine I. Mandara<sup>4</sup>, Oksana Kharabora<sup>1</sup>, Rachel Sendor<sup>2</sup>, Alfred Simkin<sup>10</sup>, Alfred Amambua-Ngwa<sup>3</sup>, Antoinette Tshetu<sup>5</sup>, Abebe A. Fola<sup>10</sup>, Deus S. Ishengoma<sup>4,11,12</sup>, Jeffrey A. Bailey<sup>10,13</sup>, Jonathan B. Parr<sup>1,14,15</sup>, Jessica T. Lin<sup>1, 14, 16</sup>, and Jonathan J. Juliano<sup>1,2,14, 15</sup>

<sup>1</sup>Institute for Global Health and Infectious Diseases, University of North Carolina, Chapel Hill, NC USA 27599

<sup>2</sup>Department of Epidemiology, Gillings School of Global Public Health, University of North Carolina, Chapel Hill, NC, USA

<sup>3</sup>Disease Control and Elimination Theme, Medical Research Council Unit The Gambia at LSHTM, Fajara, The Gambia

<sup>4</sup>National Institute for Medical Research, Dar es Salaam, Tanzania

<sup>5</sup>Kinshasa School of Public Health, Kinshasa, Democratic Republic of Congo

<sup>6</sup>Muhimbili University of Health and Allied Sciences, Bagamoyo, Tanzania

<sup>7</sup>Department of Biochemistry, Faculty of Science, University of Dschang, Dschang, Cameroon

<sup>8</sup>Programme Nationale de Lutte contre le Paludisme, Democratic Republic of Congo

<sup>9</sup>School of Public Health, University of Lubumbashi, Lubumbashi, Democratic Republic of Congo

<sup>10</sup>Department of Pathology and Laboratory Medicine, Warren Alpert Medical School, Brown University, RI USA 02906

<sup>11</sup>Harvard T. H. Chan School of Public Health, Boston, MA

<sup>12</sup>Department of Biochemistry, Kampala International University in Tanzania, Dar es Salaam, Tanzania

<sup>13</sup>Center for Computational Molecular Biology, Brown University, RI, USA 02906

<sup>14</sup>Division of Infectious Diseases, University of North Carolina School of Medicine, University of North Carolina at Chapel Hill, Chapel Hill, NC, USA 27599

<sup>15</sup>Curriculum of Genetics and Molecular Biology, University of North Carolina School of Medicine, University of North Carolina at Chapel Hill, Chapel Hill, NC, USA 27599

<sup>16</sup>Department of Microbiology and Immunology, University of North Carolina School of Medicine, University of North Carolina, Chapel Hill, NC, USA

## Table of Contents

|                 |    |
|-----------------|----|
| Figure S1.....  | 3  |
| Figure S2.....  | 4  |
| Figure S3.....  | 5  |
| Figure S4.....  | 6  |
| Figure S5.....  | 7  |
| Figure S6.....  | 8  |
| Figure S7.....  | 9  |
| Figure S8.....  | 10 |
| Figure S9.....  | 11 |
| Figure S10..... | 12 |
| Figure S11..... | 13 |
| Figure S12..... | 14 |
| Figure S13..... | 15 |
| Figure S14..... | 16 |
| Figure S15..... | 17 |
| Figure S16..... | 18 |
| Figure S17..... | 19 |
| Figure S18..... | 20 |
| Figure S19..... | 21 |
| Table S1.....   | 21 |
| Table S2.....   | 22 |
| Table S3.....   | 24 |
| Table S4.....   | 32 |
| Table S5.....   | 36 |

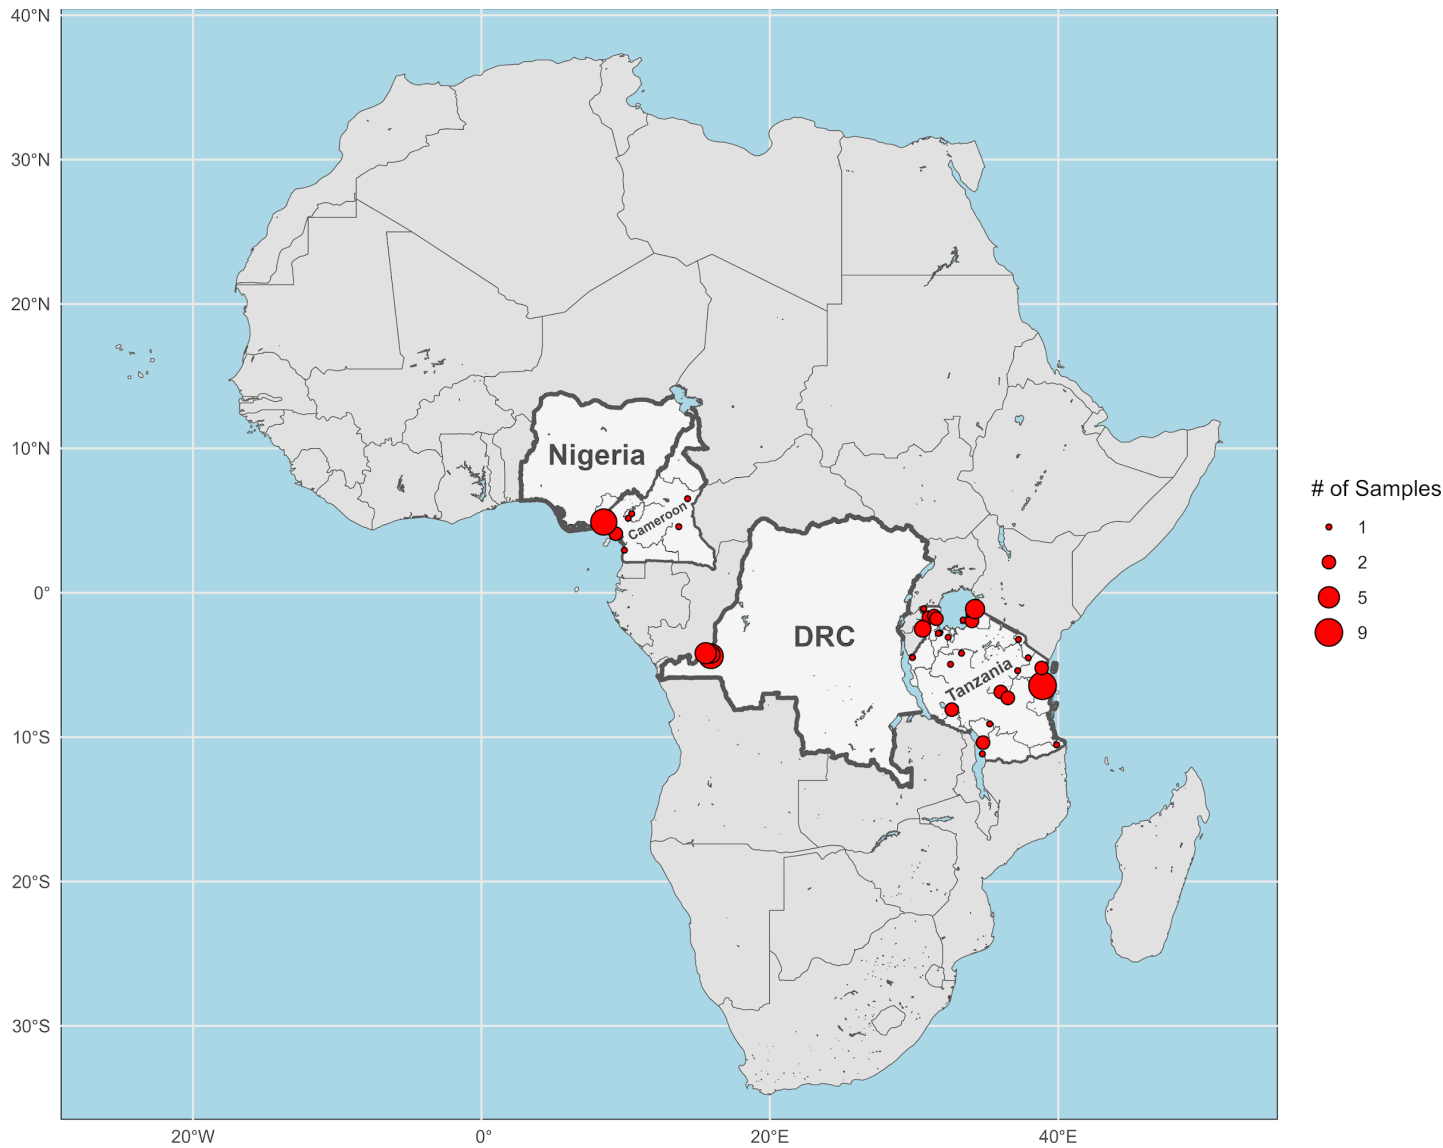

**Supplemental Figure 1 – Map of sample collection locations, scaled by size of circle.** 81 samples came from six studies across four countries (**Table 3**). Map created in R using open data from GADM database, v 3.6. [www.gadm.org](http://www.gadm.org) and the Sf package (<https://cran.r-project.org/package=sf>) with GPL-2 license (<https://cran.r-project.org/web/licenses/GPL-2>)

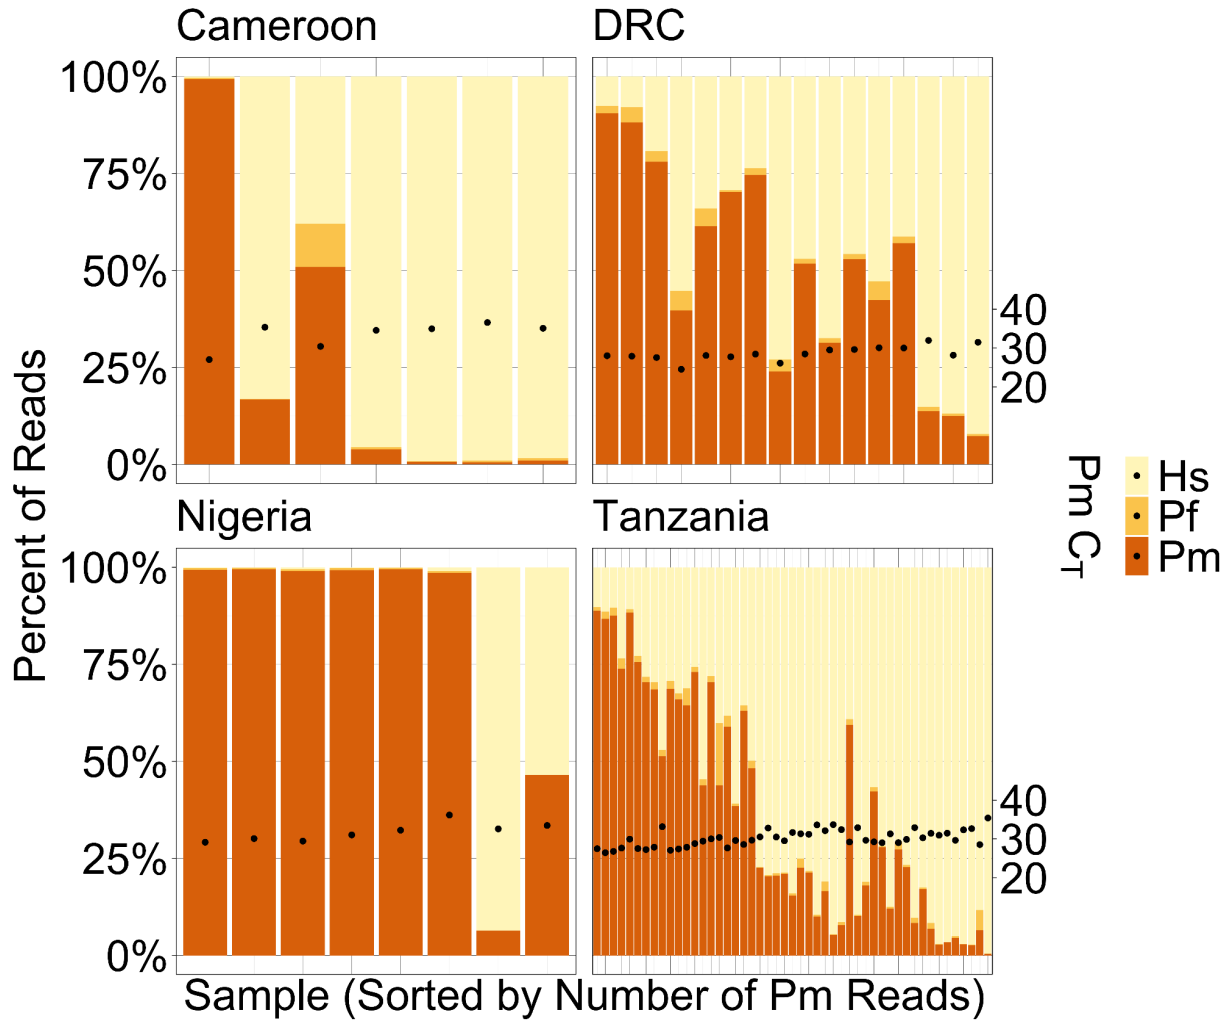

**Supplemental Figure 2 – Enrichment of *P. malariae* reads by sample, separated by country of origin.** Percent of sequencing reads aligning to *Homo sapiens* (Hs), *P. falciparum*, and *P. malariae* genomes for 81 samples. The C<sub>T</sub> cycle from the *P. malariae* 18S qPCR is also superimposed (black dots) as a scatter plot, with C<sub>T</sub> values given on the right-side y-axis.

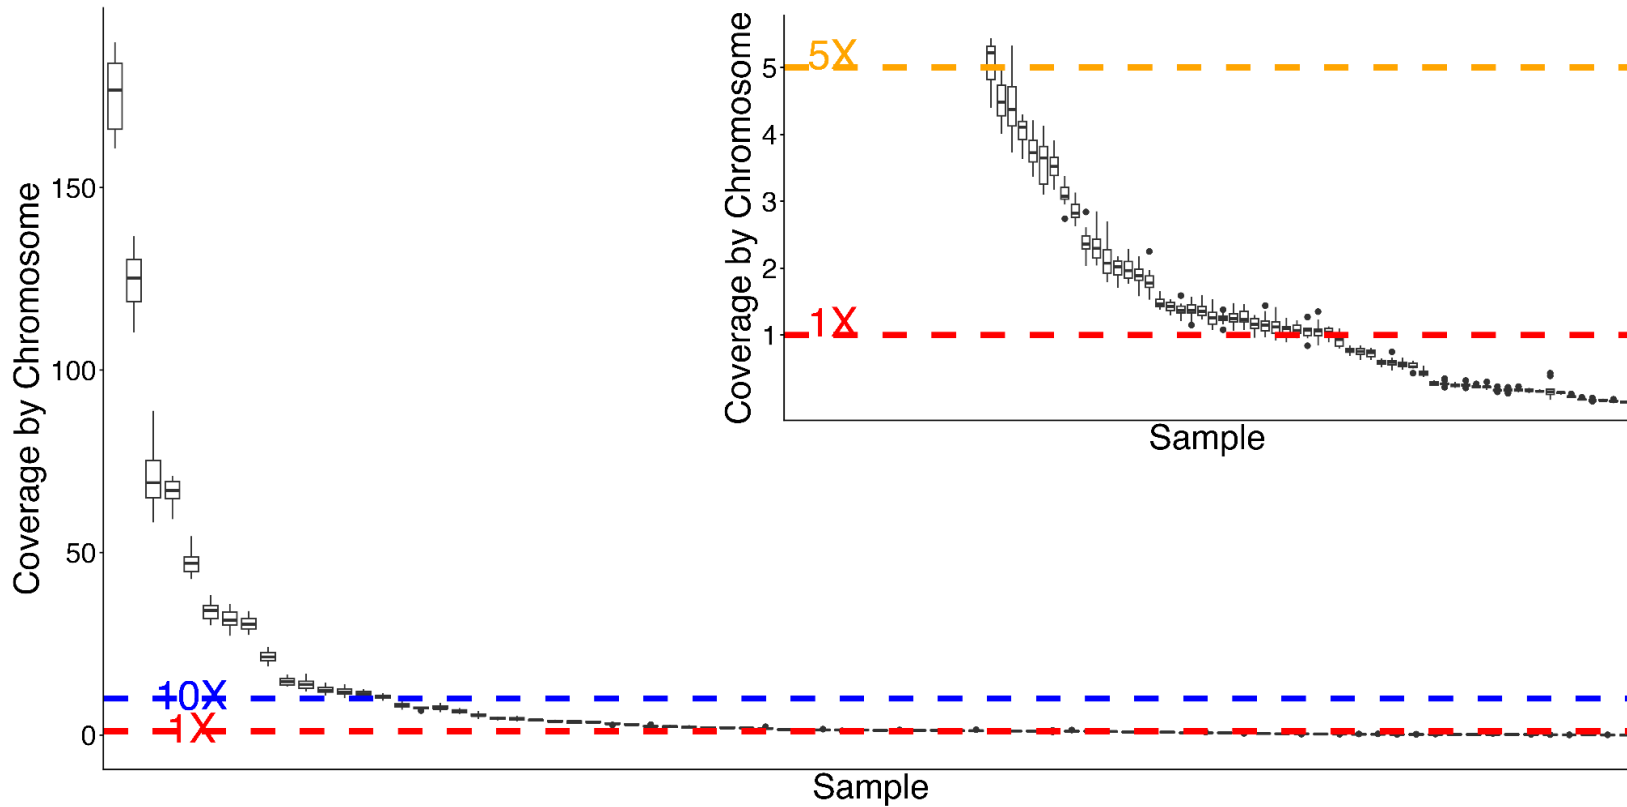

**Supplemental Figure 3 – Coverage by chromosome across all *P. malariae* samples.** Each box corresponds to a single sample and displays the average coverage for each of the 14 chromosomes. Boxes highlight 25<sup>th</sup>, 50<sup>th</sup>, and 75<sup>th</sup> percentiles. The inset plot shows those samples with average coverage values between <1X and 5X

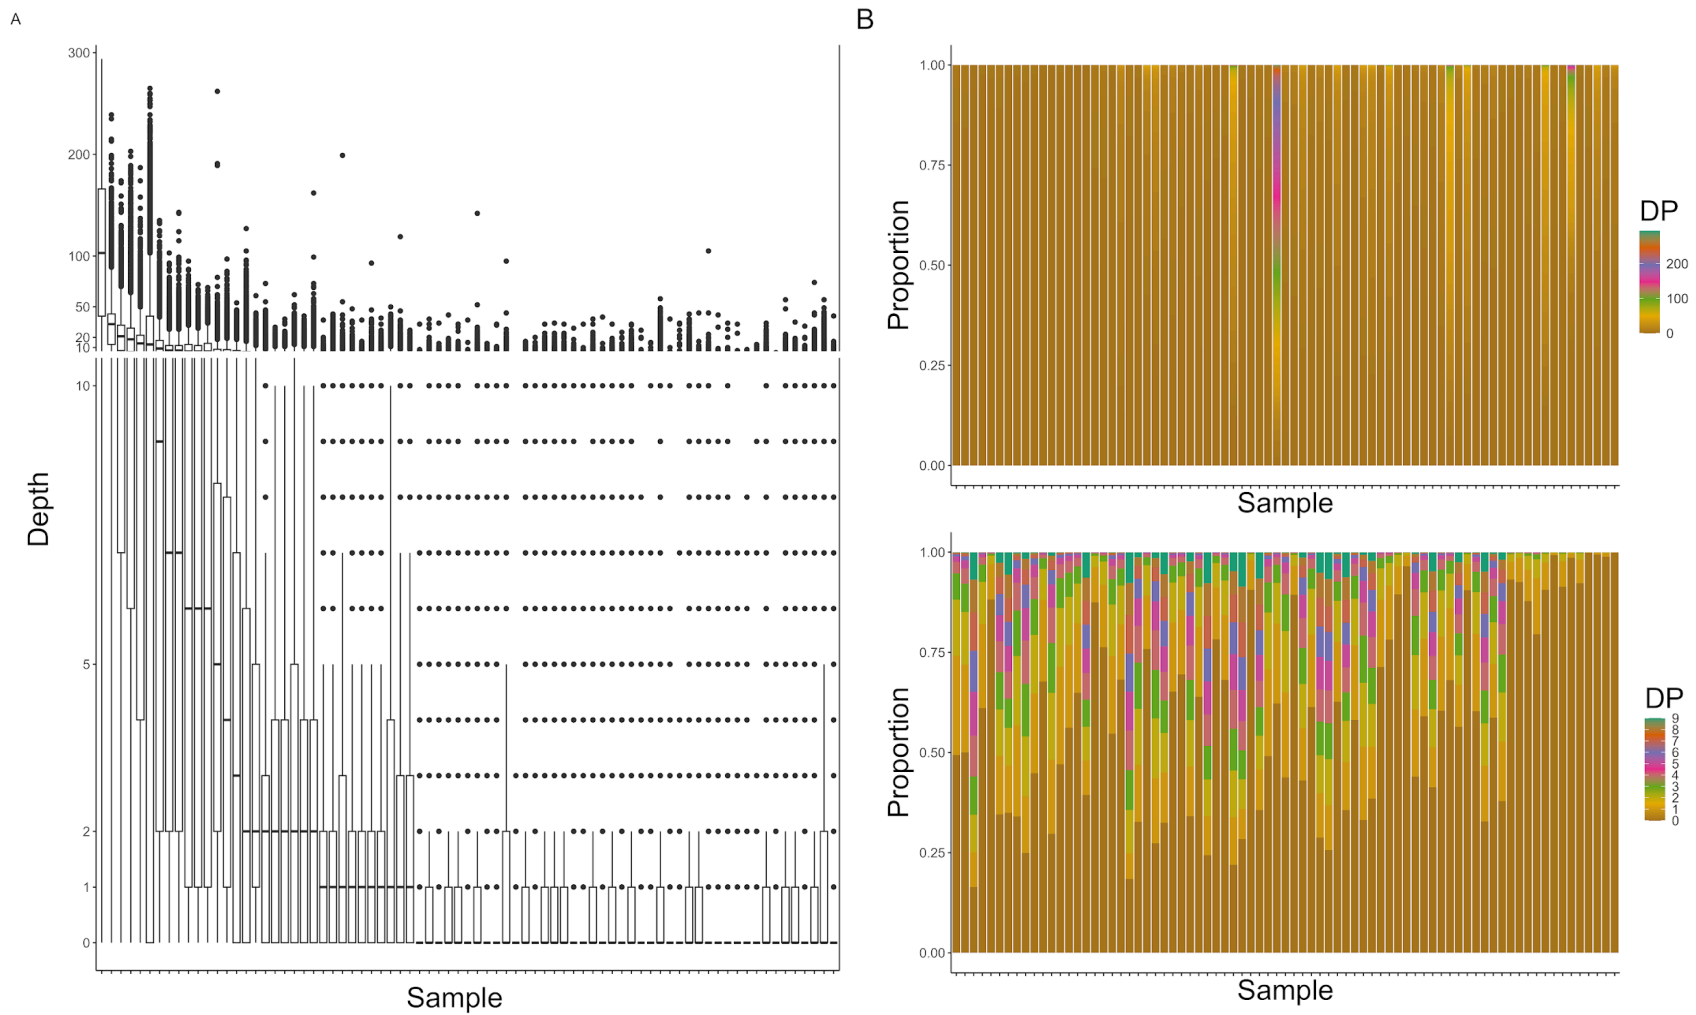

**Supplemental Figure 4 – Per-sample depth across all variants for *P. malariae*: A) boxplot, B) barplot showing frequency of depth values.** Outliers in the boxplot are more than 1.5\*interquartile range. The top panel of panel B shows the overall depth distribution, while the bottom panel highlights depth distribution values <10 for easier visualization.

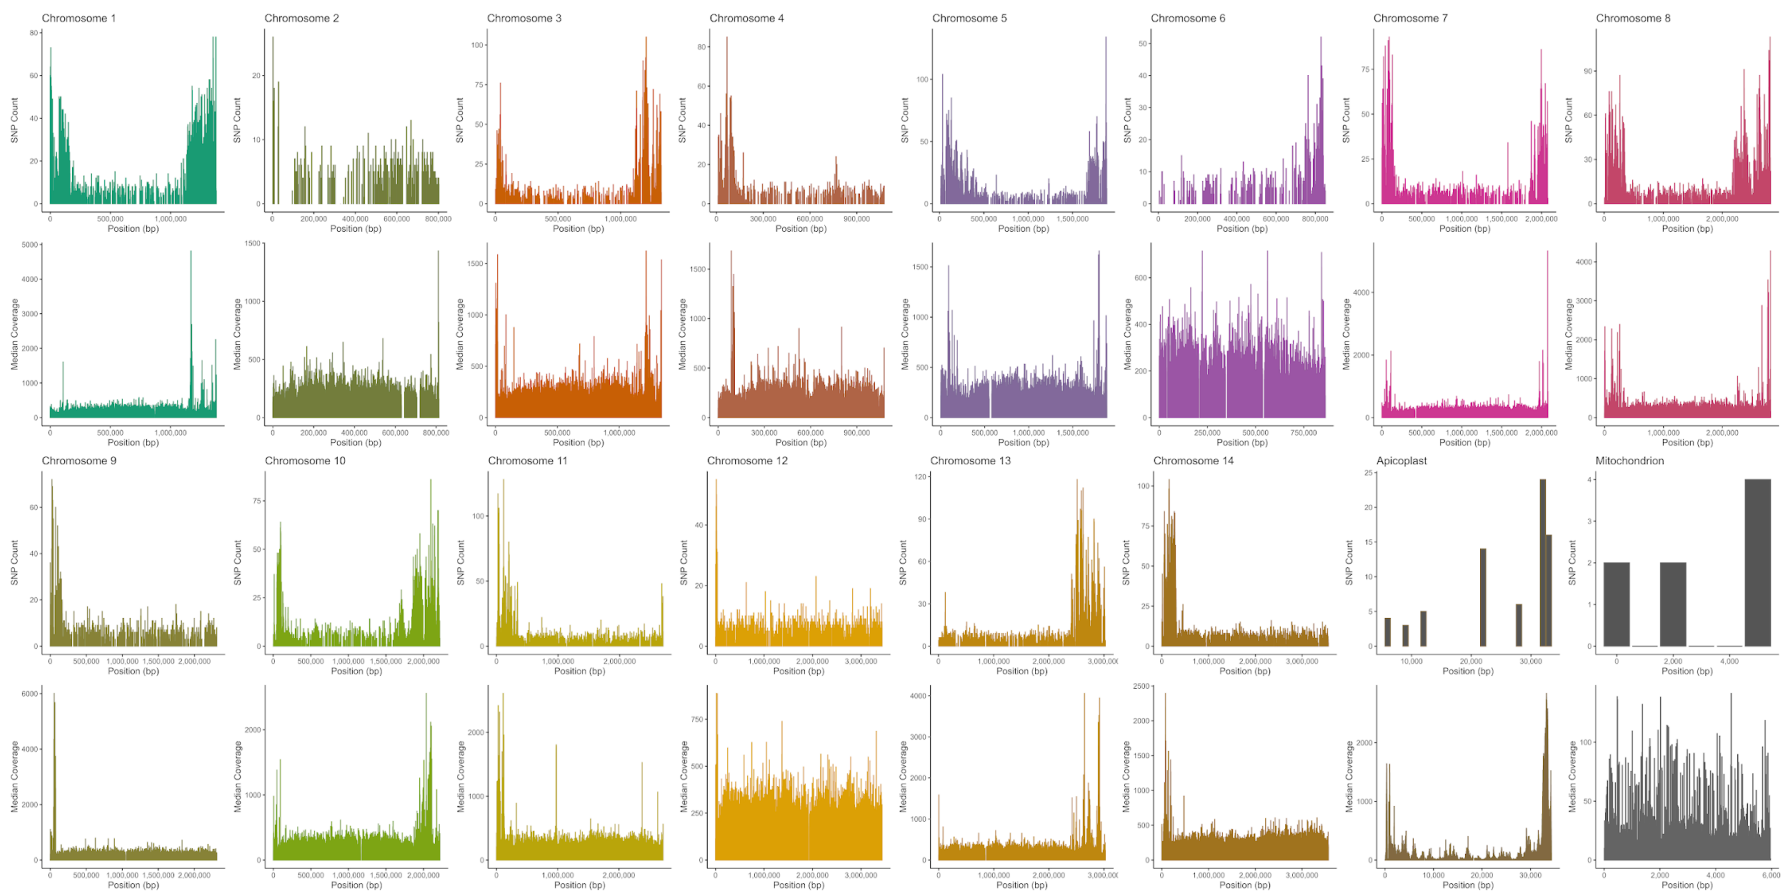

**Supplemental Figure 5 – Median Coverage and SNP Count by Chromosome in *P. malariae*.** Both values are shown in 1kb bins. Hypervariable regions are excluded from both plots.

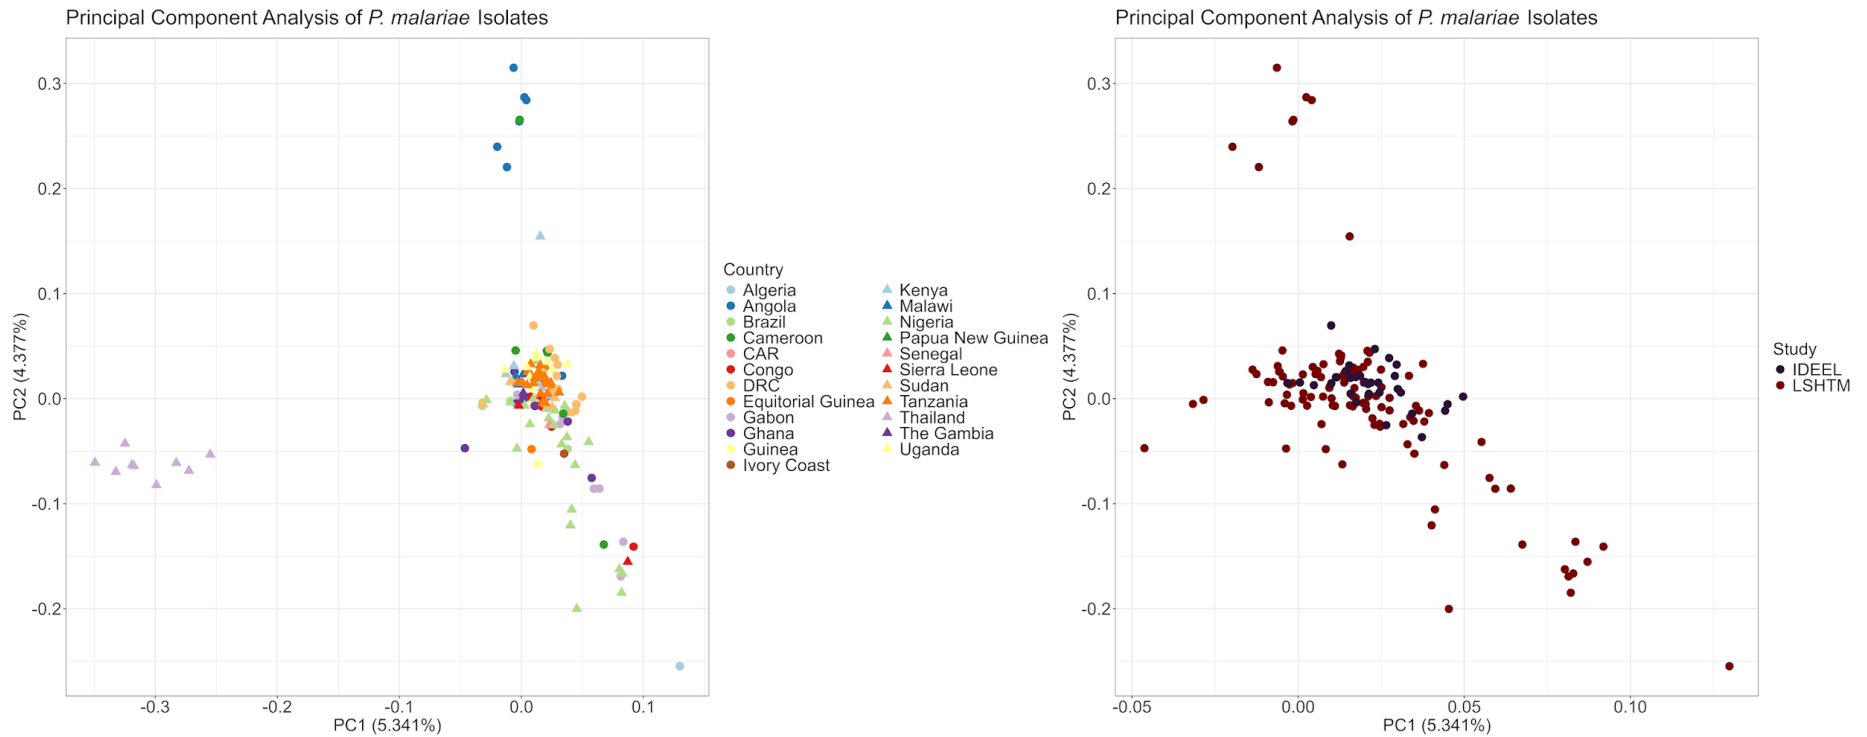

**Supplemental Figure 6 – Principal component analysis of monoclonal *P. malariae* isolates.** 161 monoclonal *P. malariae* isolates, and 18,039 biallelic SNPs are included from two sample sets based on the filtering thresholds to generate a set of consistently genotyped variants, as described in the “Incorporation of Published Sequence Data” section of the Methods. Left Panel) Full PCA including all samples, colored by country of origin. Right Panel) PCA depicts only 147 African isolates, colored by sample set (IDEEL refers to our research group, and LSHTM refers to the research group that generated the other sequence data, n = 31 and n = 116, respectively).

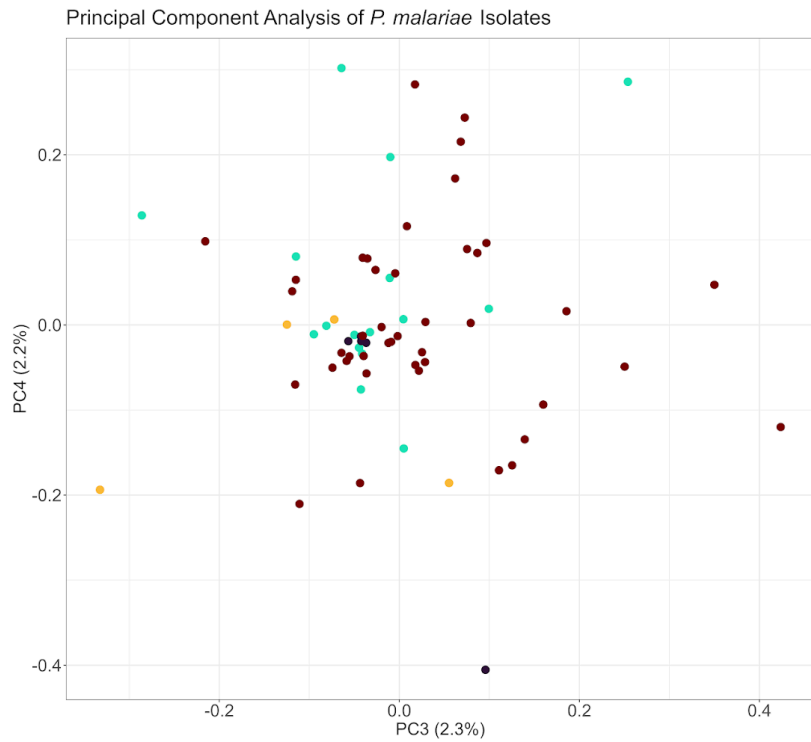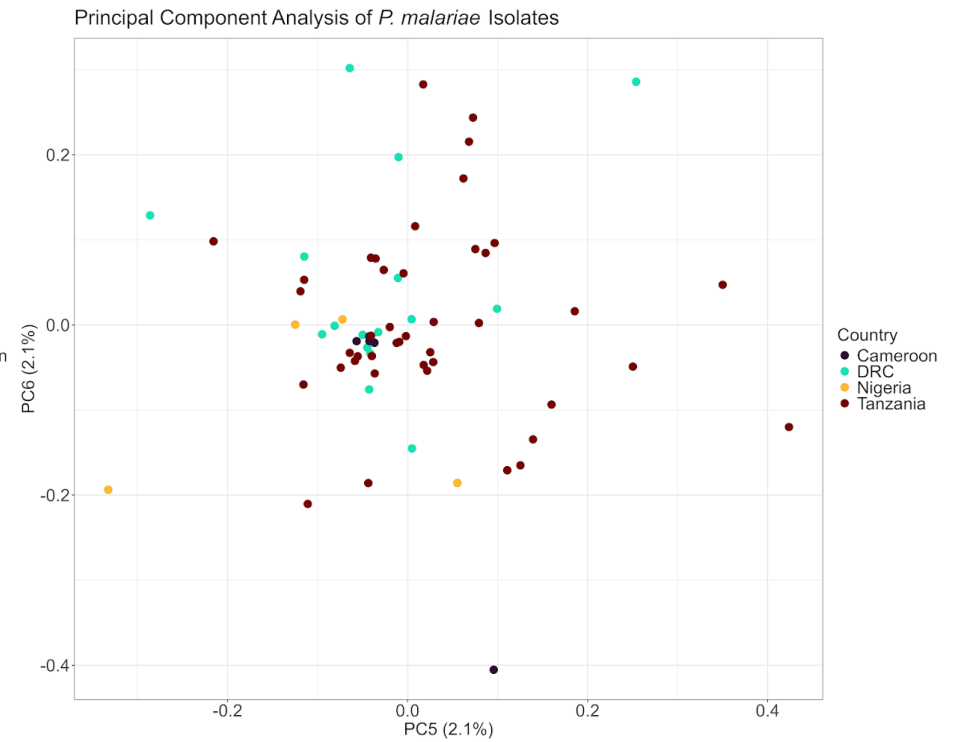

**Supplemental Figure 7 – Principal component analysis of monoclonal *P. malariae* isolates.** 71 monoclonal *P. malariae* isolates and 178,036 biallelic SNPs are included. Principal components 4 to 6 (percent of total variation explained) are depicted with isolates colored by country of origin (Cameroon n = 6, DRC n = 16, Nigeria n = 3, Tanzania n = 45).

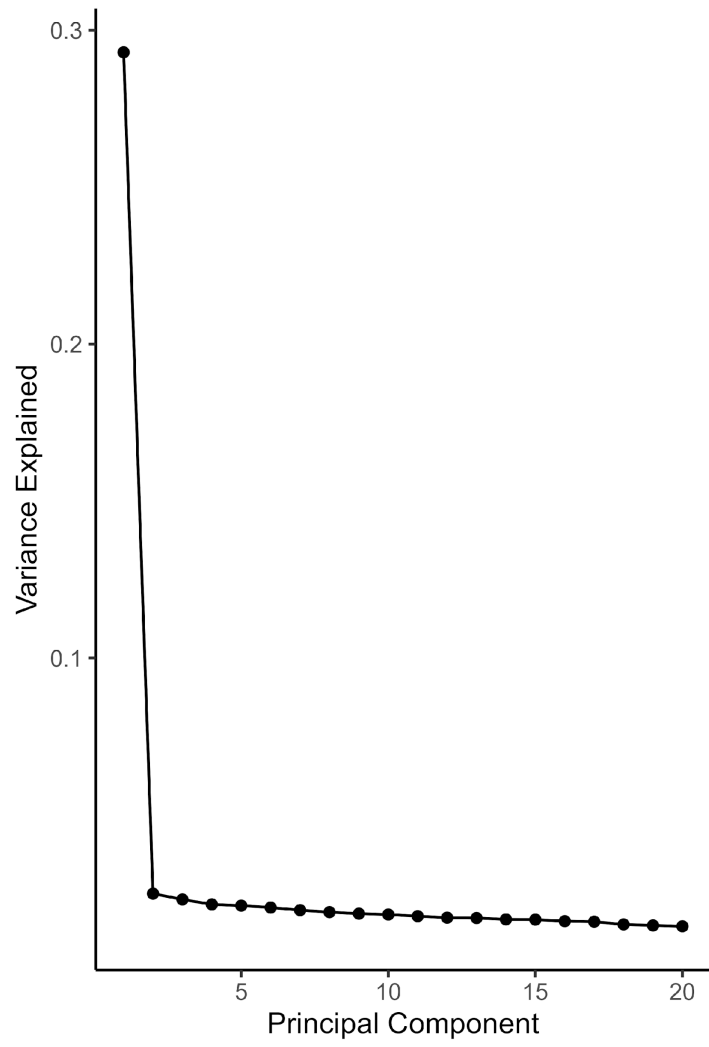

**Supplemental Figure 8 – Scree plot of variance explained by principal components for *P. malariae*.**

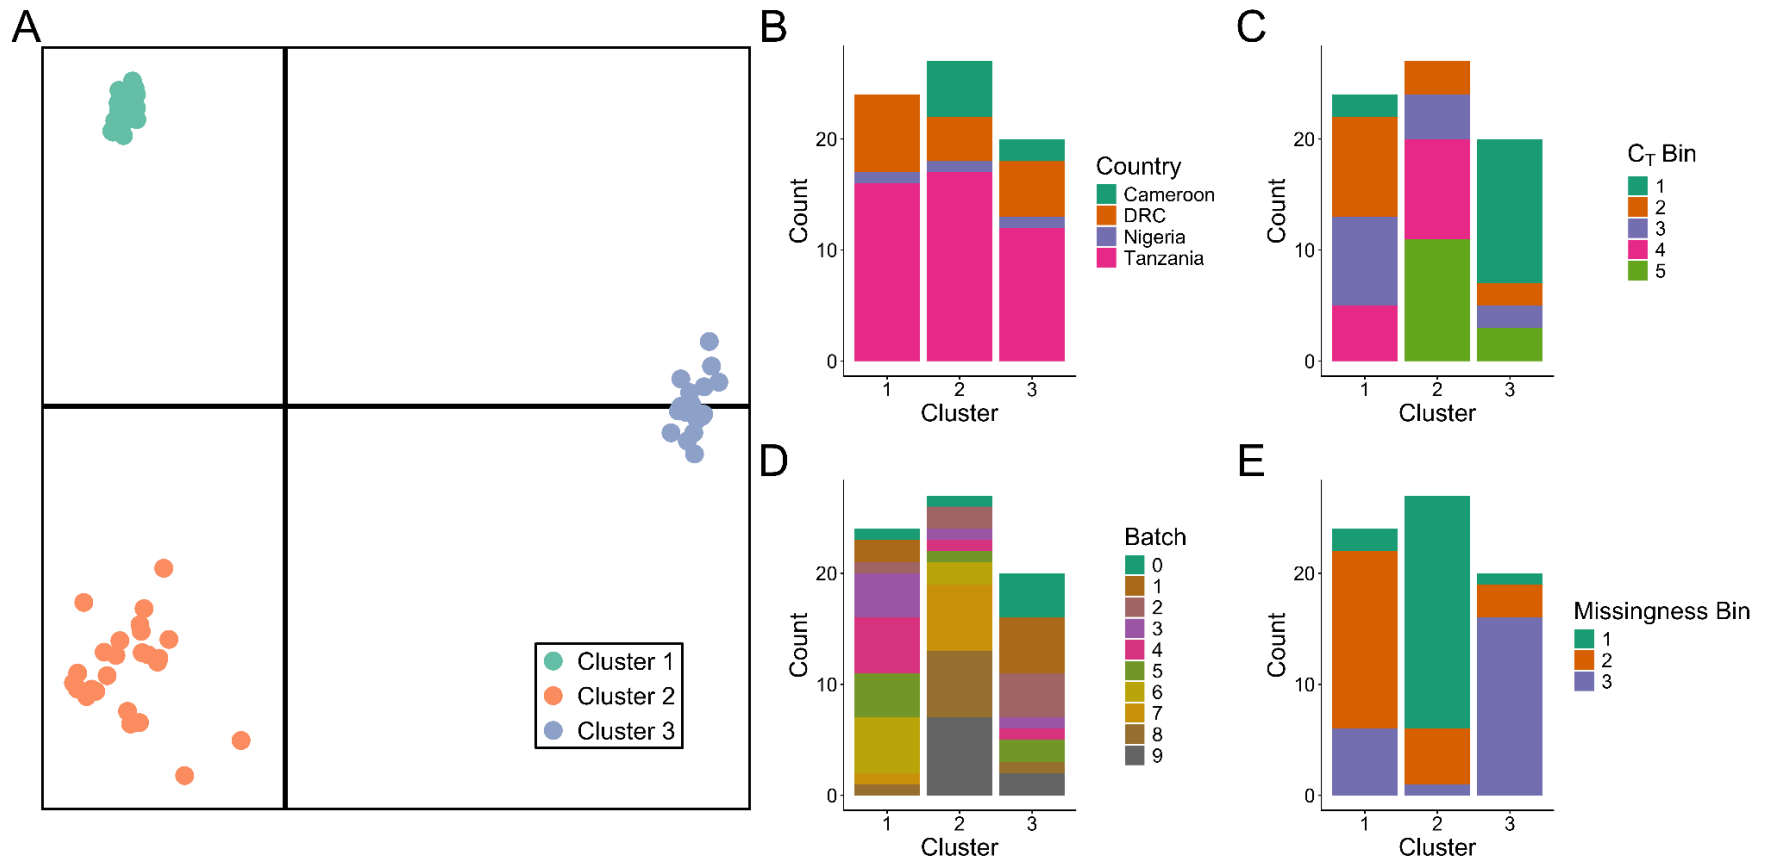

**Supplemental Figure 9 – Discriminant PCA showing three putative population clusters within 71 monoclonal African *P. malariae* samples.** A) Discriminant PCA plot; B) Stacked bar plot of samples belonging to each population cluster by country of origin; C) Stacked bar plot of samples belonging to each population cluster by relative parasitemia ( $C_T$  values divided into five equal bins); D) Stacked bar plot of samples belonging to each population cluster by hybrid capture batch; E) Stacked bar plot of samples belonging to each population cluster by per-sample missingness (divided into three equal bins). No clear trend is observed concerning any of these variables.

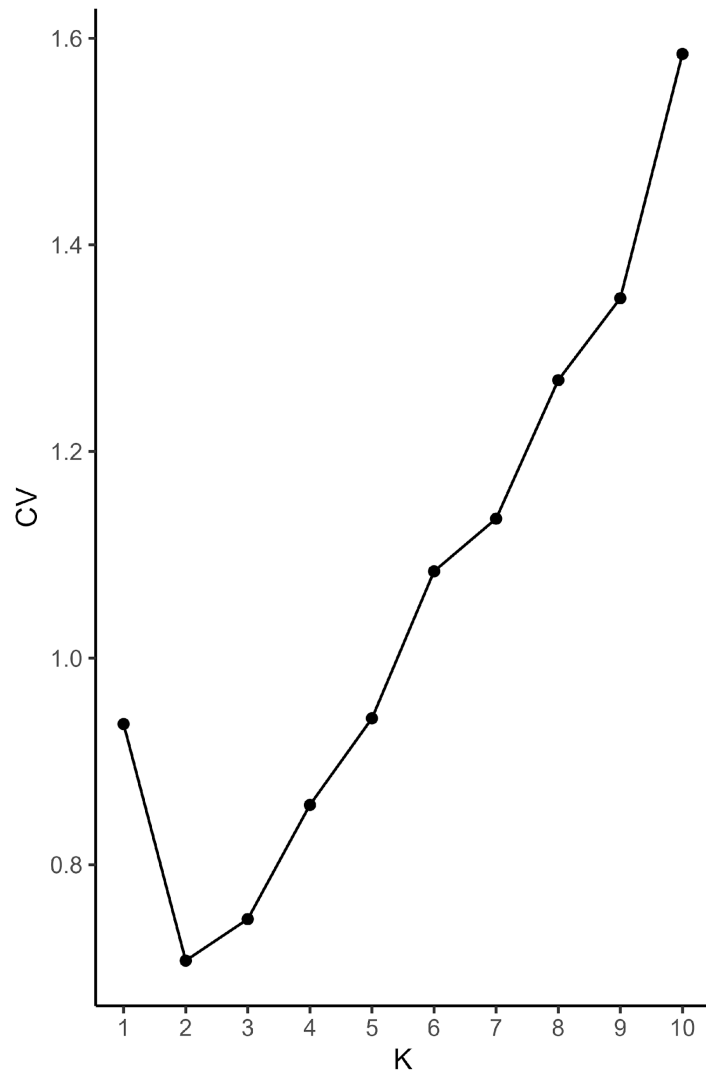

**Supplemental Figure 10 – ADMIXTURE cross-validation (CV) error for K values 1 through 10 in *P. malariae*.**

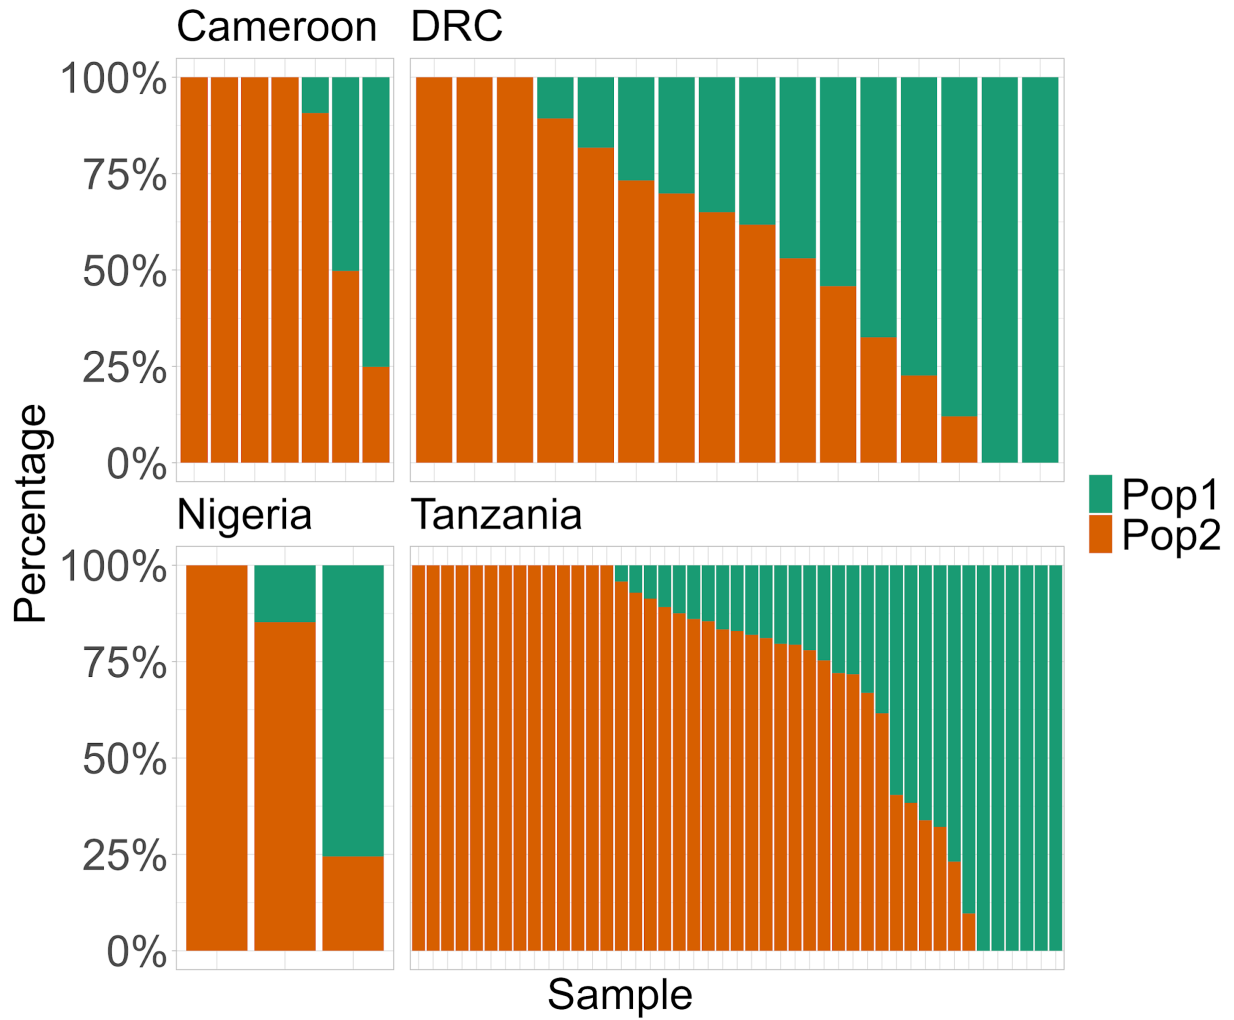

**Supplemental Figure 11 – ADMIXTURE plot of population identity for 71 monoclonal *P. malariae* isolates with K=2 (the value with the lowest cross-validation error). No clear geographic separation is visible.**

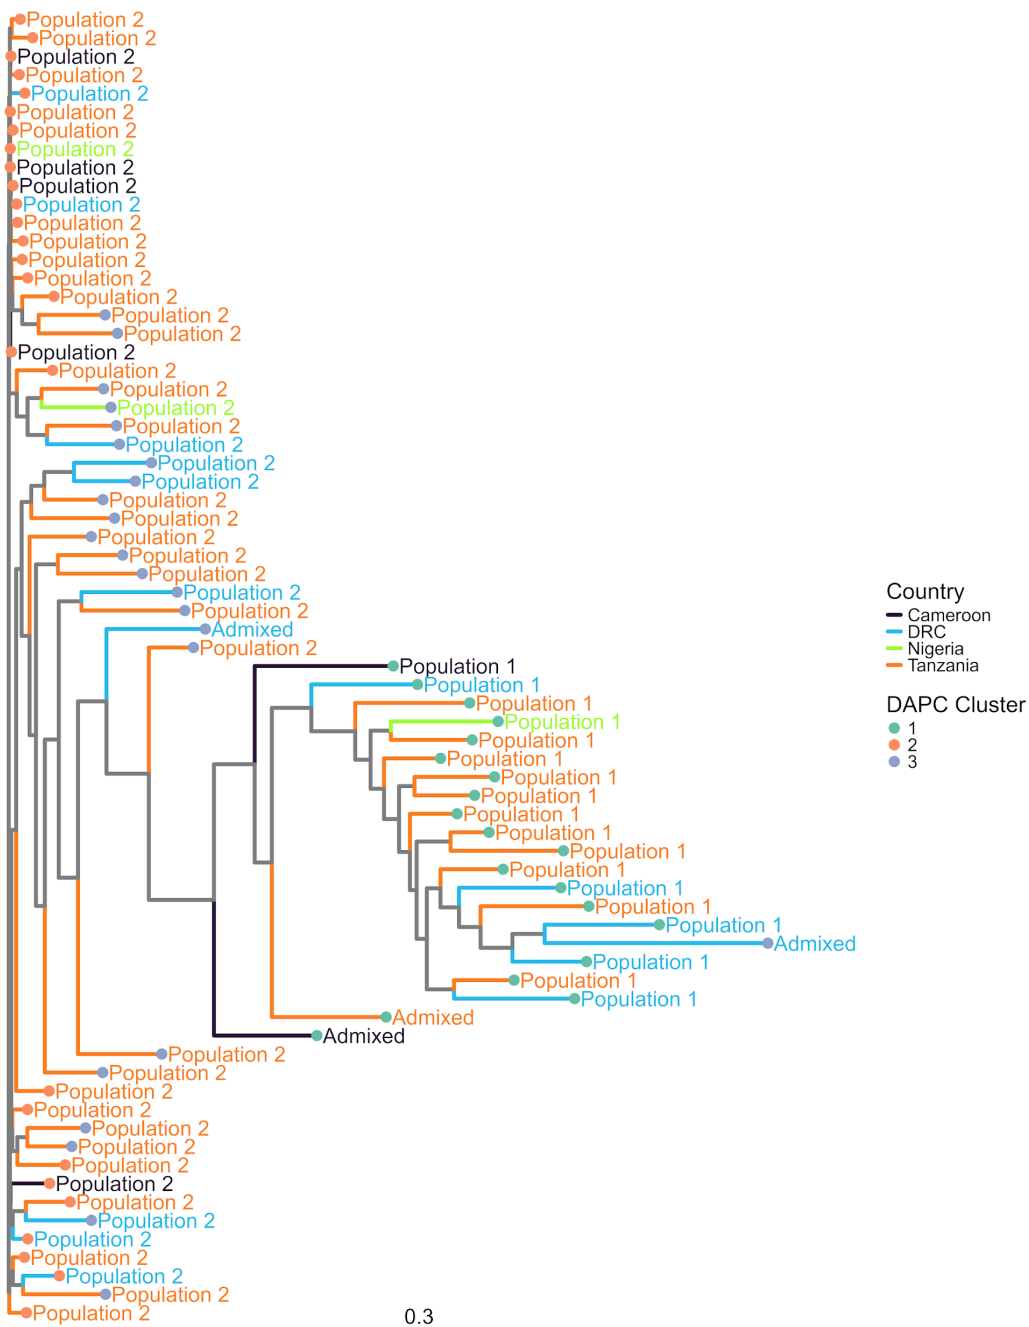

**Supplemental Figure 12 – Maximum likelihood phylogeny of 71 monoclonal *P. malariae* isolates.** Phylogeny was generated with RAxML Next Generation, using 10 starting trees and 200 bootstraps. Branches are colored by country of origin, with grey used to indicate interior nodes that do not reflect known isolates. Text labels correspond to the primary population determined by ADMIXTURE (see **Supplemental Figure 5**). Samples with population proportions between 40% and 60% are considered to be admixed. Finally, tip label colors correspond to DAPC clusters (see **Supplemental Figure 3**).

*P. malariae*

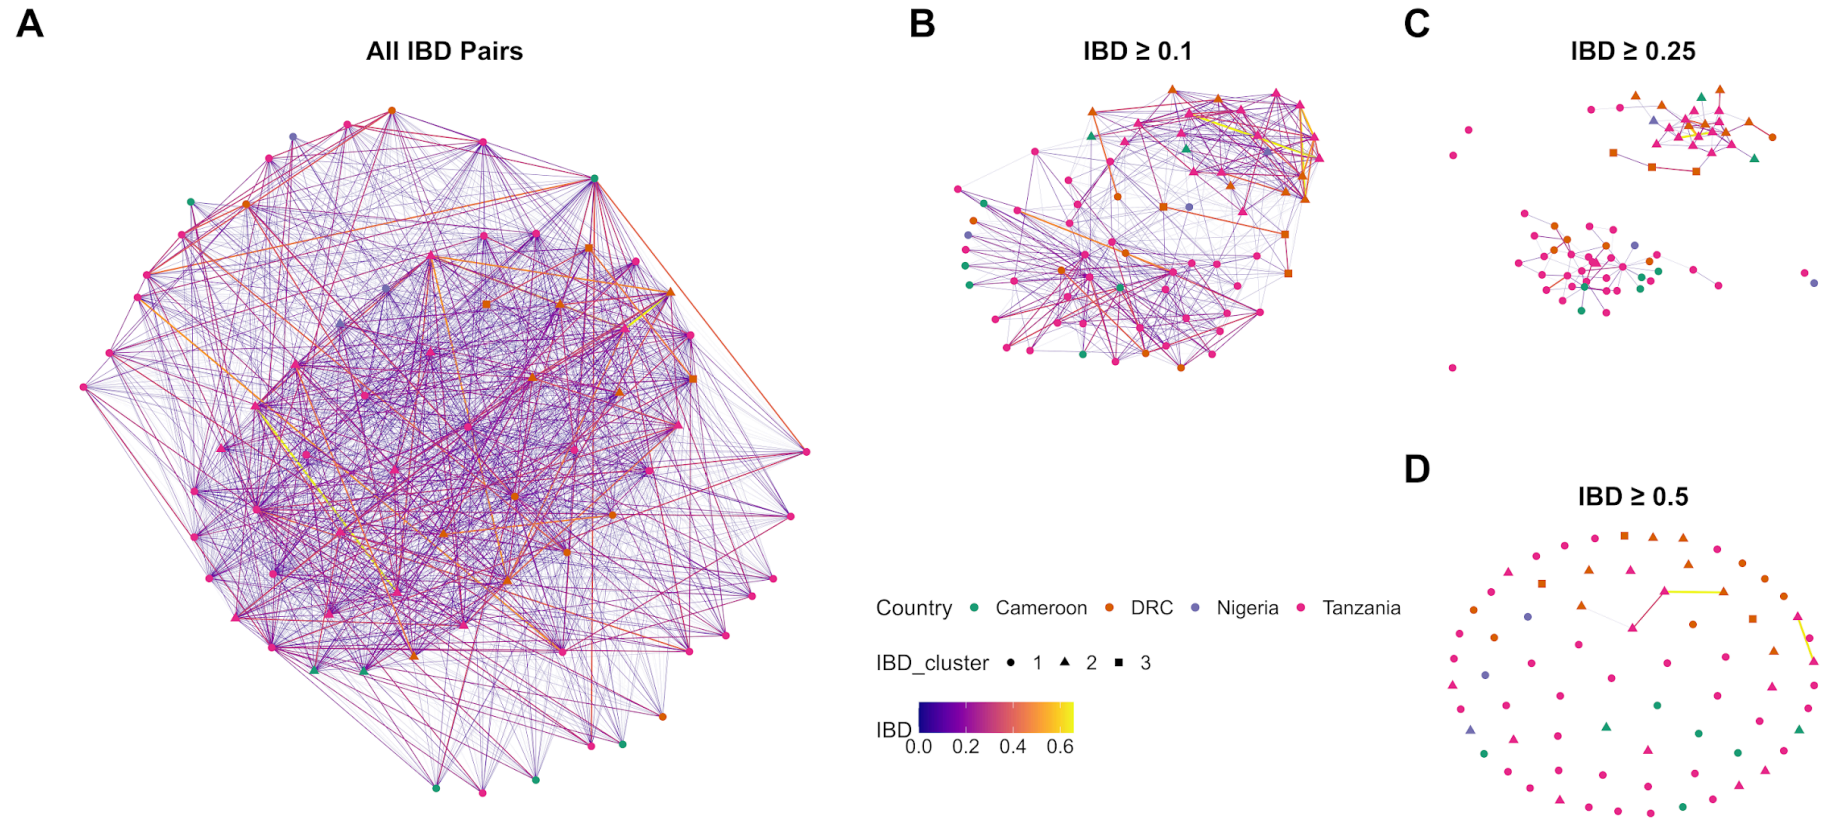

**Supplemental Figure 13 – Pairwise identity-by-descent (IBD) networks of 71 monoclonal *P. malariae* isolates: A) all IBD pairs, B) Pairs with IBD  $\geq 0.1$ , C) Pairs with IBD  $\geq 0.25$ , and D) Pairs with IBD  $\geq 0.5$ . IBD inference was performed using hmmlBD. Node colors correspond to country, node shapes correspond to the cluster assigned by hmmlBD, and edge colors and width correspond to the degree of pairwise IBD.**

*P. falciparum*

**A**

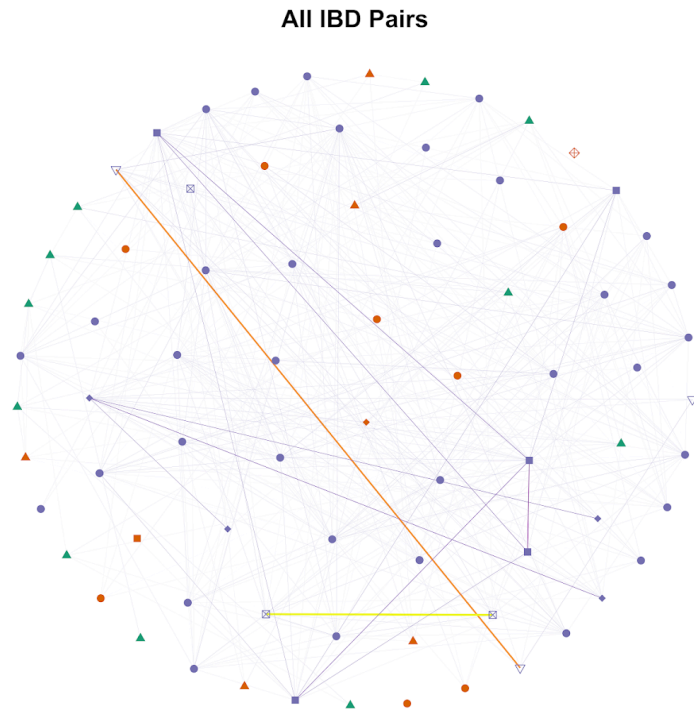

**B**

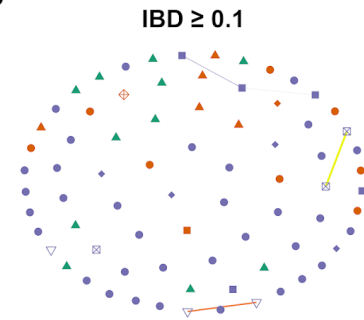

**C**

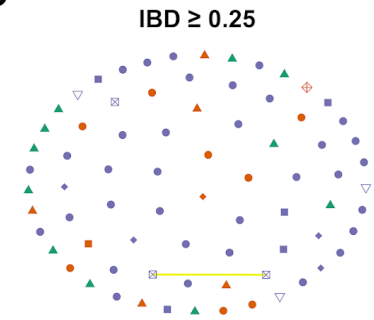

**D**

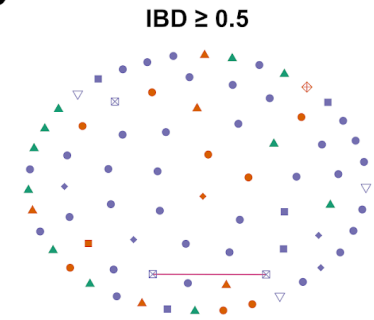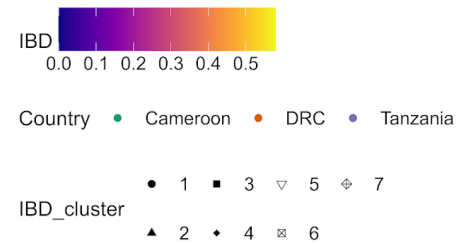

**Supplemental Figure 14 – Pairwise identity-by-descent (IBD) networks of 76 monoclonal *P. falciparum* isolates: A) all IBD pairs, B) Pairs with IBD  $\geq 0.1$ , C) Pairs with IBD  $\geq 0.25$ , and D) Pairs with IBD  $\geq 0.5$ . IBD inference was performed using hmmlBD. Node colors correspond to country, node shapes correspond to the cluster assigned by hmmlBD, and edge colors and width correspond to the degree of pairwise IBD.**

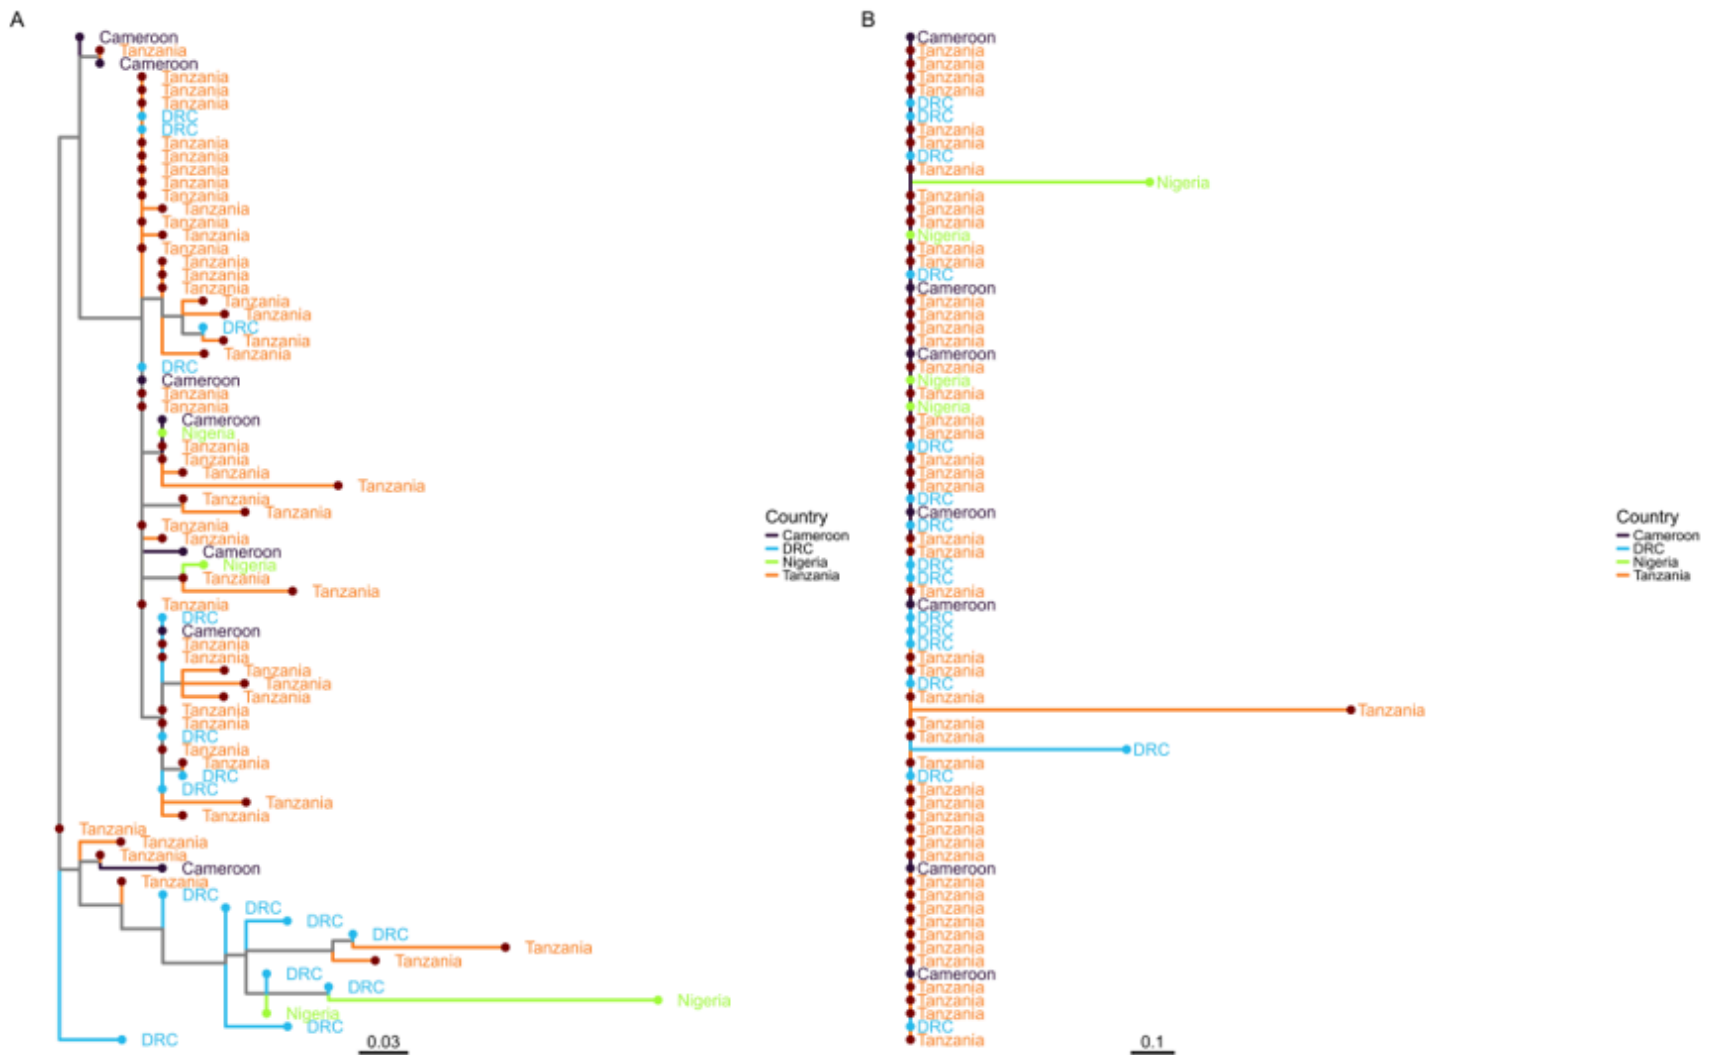

**Supplemental Figure 15 – Maximum likelihood phylogeny of 71 monoclonal *P. malariae* isolates based on SNPs detected in A) apicoplast (n = 82) and B) mitochondrion (n = 7). Phylogeny was generated with RAxML Next Generation, using 10 starting trees and 50 bootstraps. Branches are colored by country of origin, with grey used to indicate interior nodes that do not reflect known isolates.**

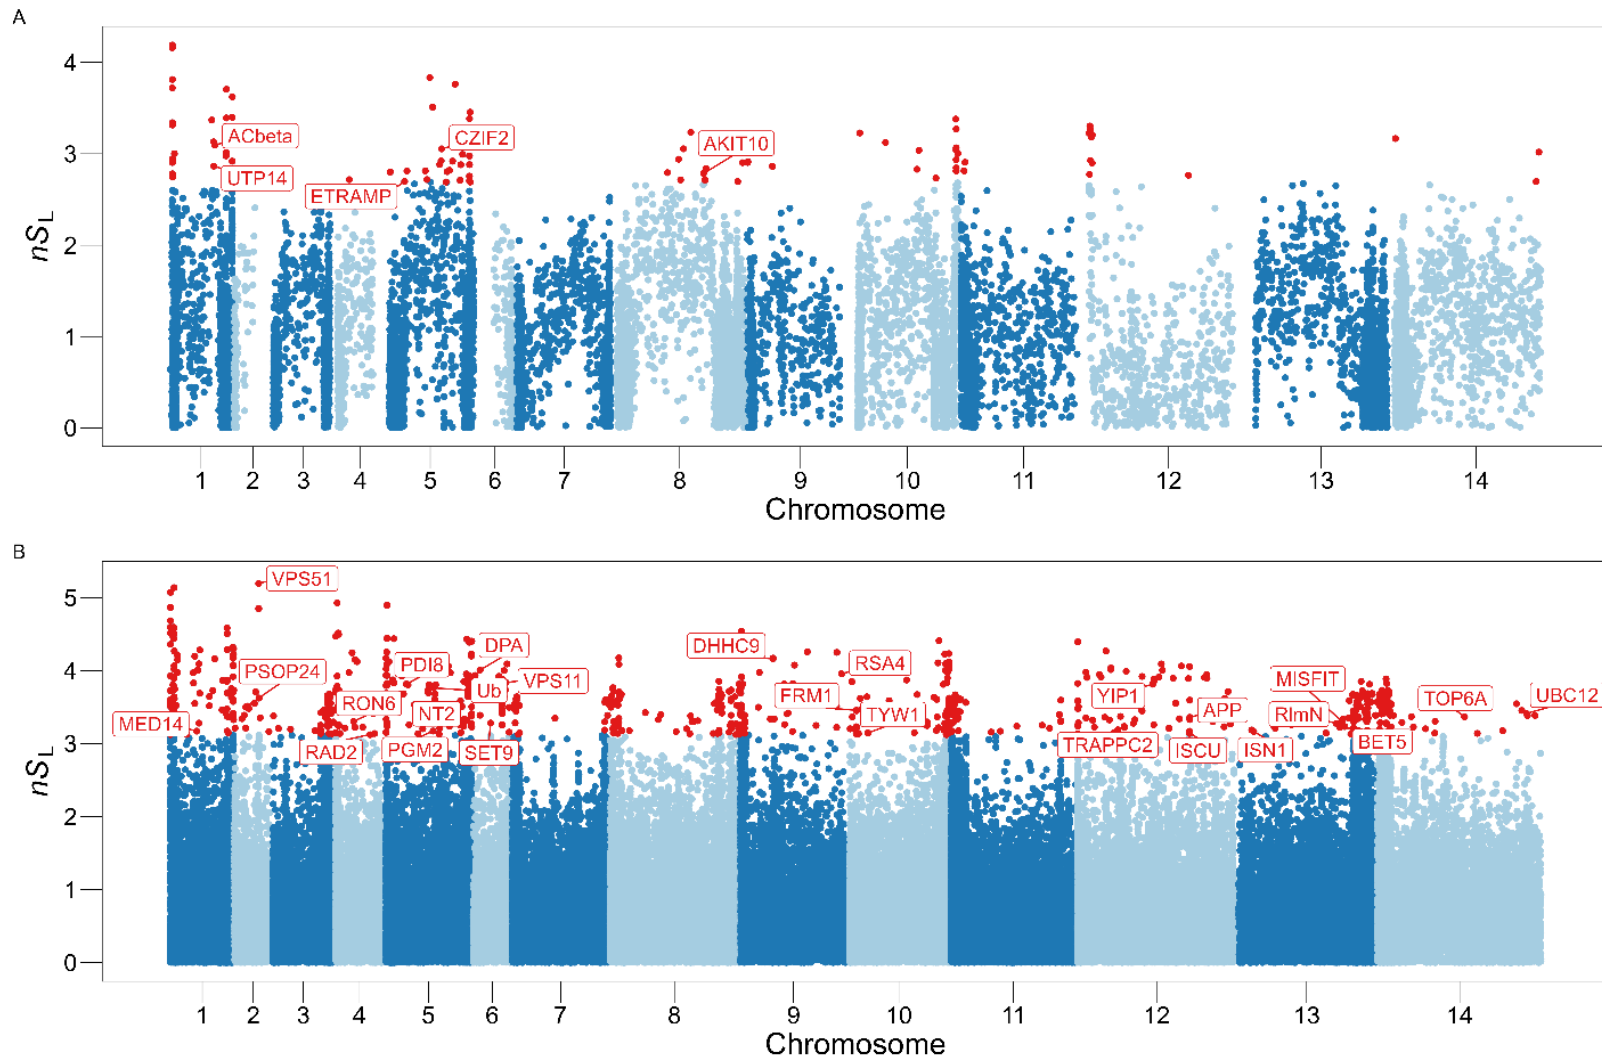

**Supplemental Figure 16 – Genome-wide  $nS_L$  values in *P. malariae* with A) a minor allele frequency cutoff of 0.05 applied and B) no minor allele frequency cutoff applied. Points in red are in the top 0.5% of absolute  $nS_L$  values. Annotated genes are labeled, none of which are blood-stage vaccine candidate orthologs or putative antimalarial resistance genes.**

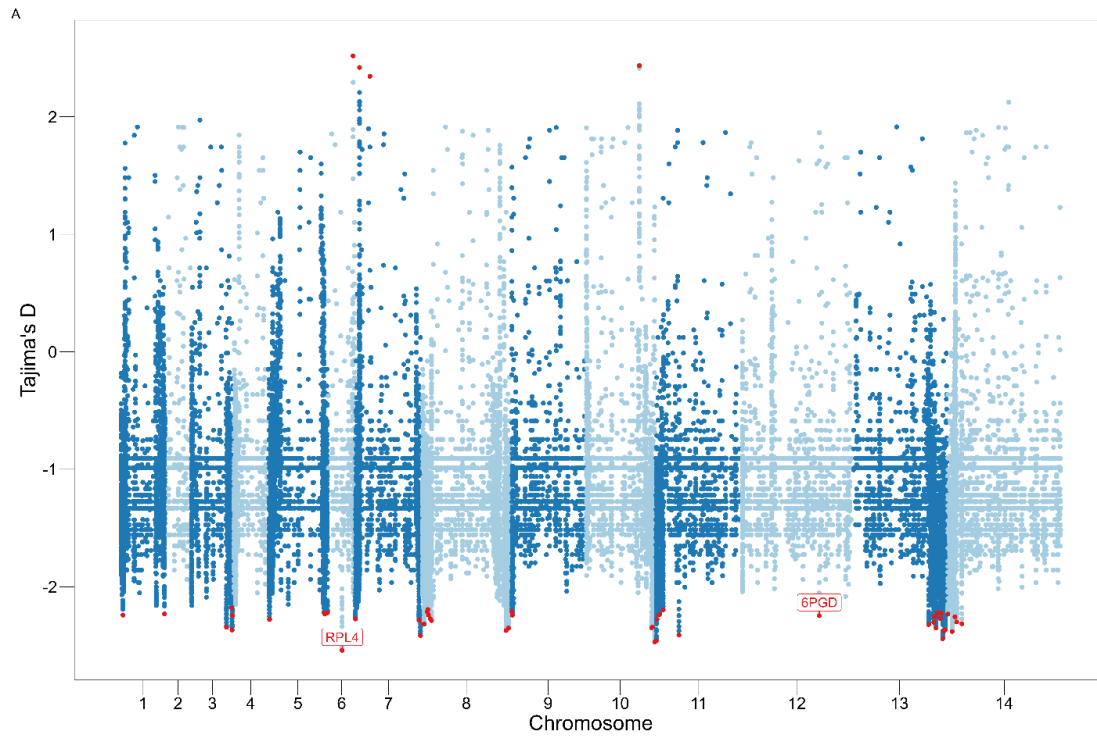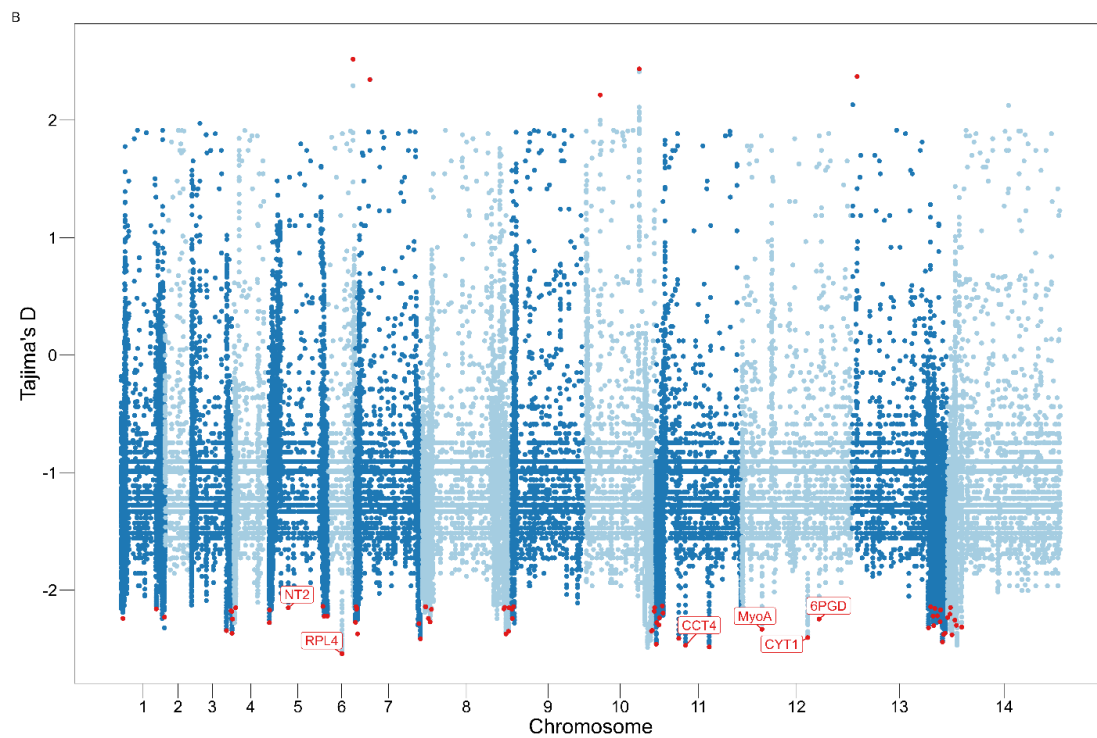

**Supplemental Figure 17 – Tajima's D values in 300 bp windows in *P. malariae* across A) genes and B) exons.** The top values of  $|D|$  are highlighted in red, and those with known gene annotations are labeled. Only *PmmyoA* has a known function relevant to RBC invasion. No putative antimalarial resistance genes are highlighted.

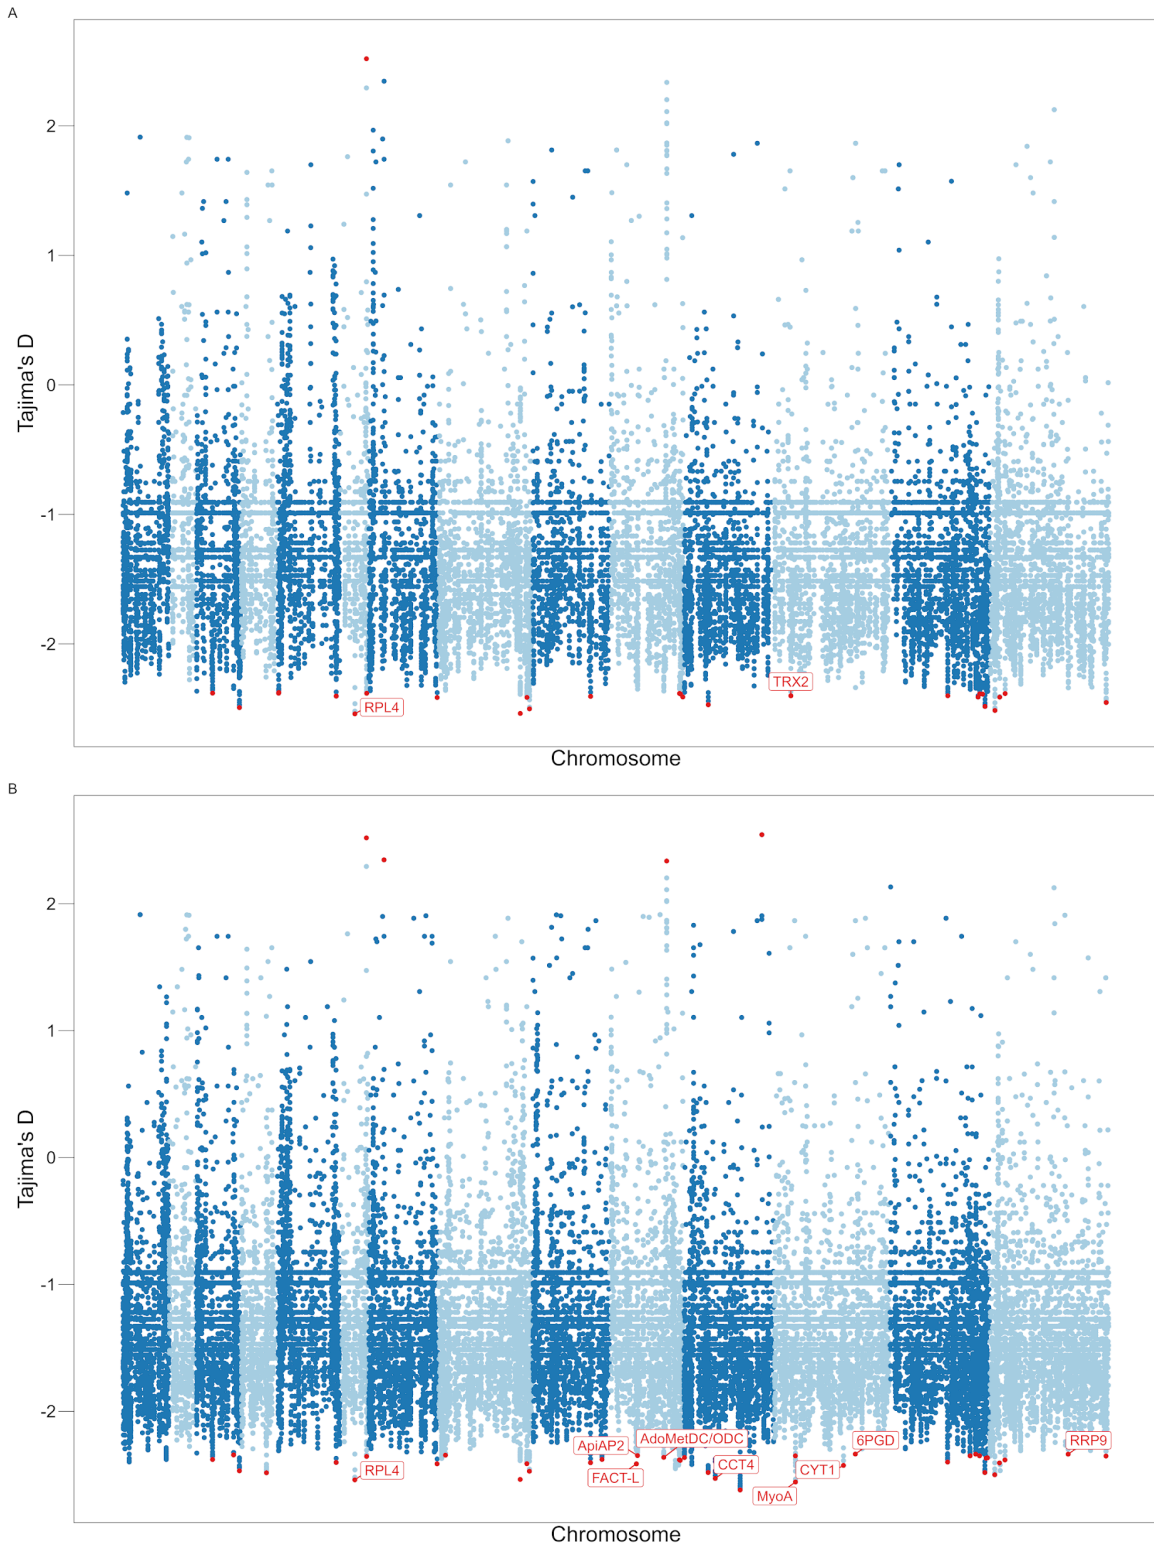

**Supplemental Figure 18 – Tajima’s D values in 2 kb windows in *P. malariae* across A) genes and B) exons.** The top values of  $|D|$  are highlighted in red, and those with known gene annotations are labeled. Only *PmmyoA* has a known function relevant to RBC invasion. No putative antimalarial resistance genes are highlighted.

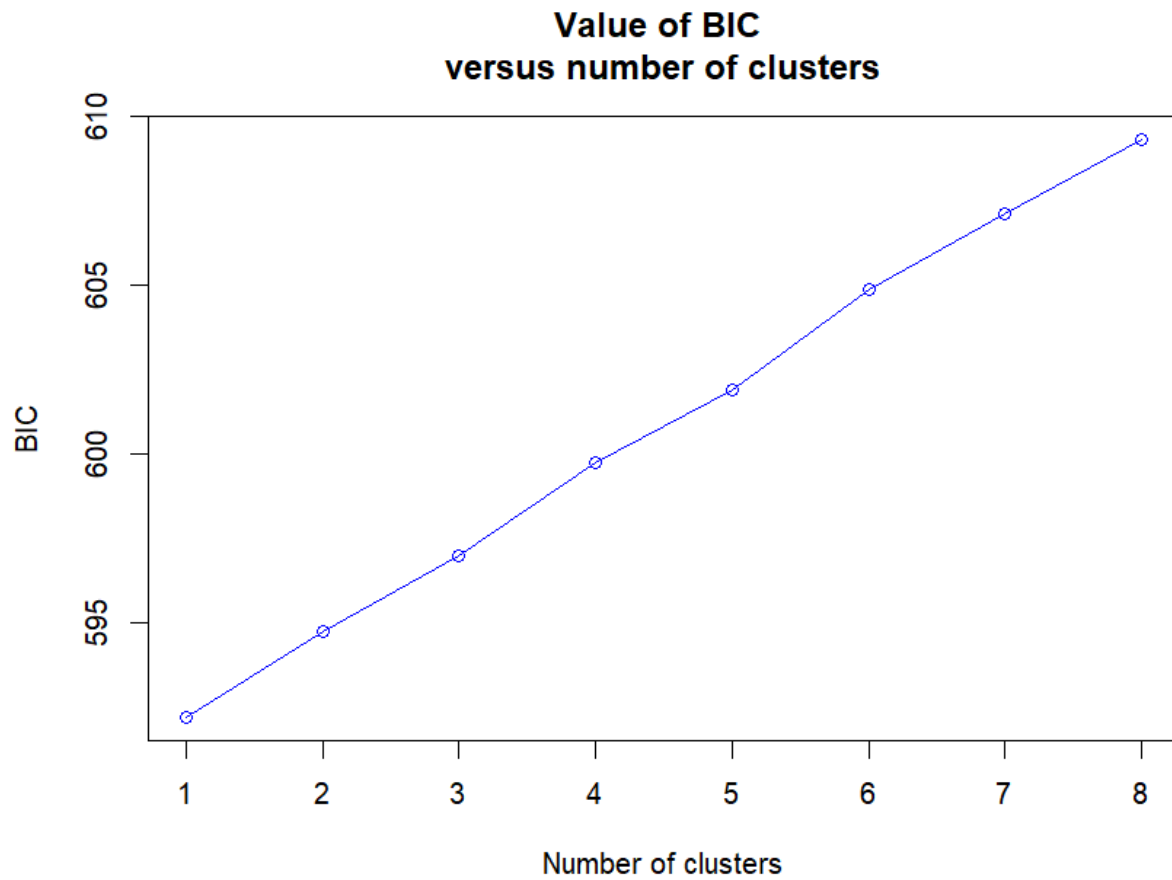

**Supplemental Figure 19 – Bayes Information Criterion (BIC) values for *P. falciparum* discriminant PCA analysis.**

**Supplemental Table 1 – Likelihood and fit of demographic models for *P. malariae***

| <b><u>Model</u></b>    | <b><u>Log Likelihood</u></b> | <b><u>CL-AIC</u></b> |
|------------------------|------------------------------|----------------------|
| Bottlegrowth           | -556                         | 14,058               |
| Growth                 | -868                         | -1,204               |
| Standard Neutral Model | -46,556                      | NA                   |
| Two Epoch              | -911                         | 27,976               |
| Three Epoch            | -514                         | -59,633              |

**Supplemental Table 2 – Parameter estimates for three-epoch model in *P. malariae*\***

| <b>Parameter</b> | <b>Definition</b>                                               | <b>Estimate</b> |
|------------------|-----------------------------------------------------------------|-----------------|
| $Nu_B$           | Ratio of $\frac{\text{Bottleneck } N_e}{\text{Ancient } N_e}$   | 4.99            |
| $Nu_F$           | Ratio of $\frac{\text{Contemporary } N_e}{\text{Ancient } N_e}$ | 33.7            |
| $T_B$            | Length of bottleneck (2*Na generations)                         | 1.05            |
| $T_F$            | Time since bottleneck recovery (2*Na generations)               | 1.47            |
| $\theta$         | Estimated population mutation rate (Watterson estimator)        | 2,558           |

\*These estimates are presented with three major caveats. 1) The goal of this analysis was not to pinpoint the timing or duration of a bottleneck or associated recovery, nor were data collected with this aim in mind. 2) The parameter estimates generated by the three-epoch model are not thought to be particularly accurate, with both  $T_B$  and bottleneck depth considered “highly confounded” (see <https://groups.google.com/g/dadi-user/c/lcgHaU7k3oc/m/gN3-7gnnBQAJ>). 3) Generation times for *P. malariae* are unknown, further confounding the interpretation of these estimates.

**Supplemental Table 3 – Genome-wide Tajima’s D top hits in *P. malariae*.** “Where Found” column reflects whether the gene in question was a top hit for gene scans, exon scans, or both.

| <u>CHROM</u> | <u>Gene ID</u>  | <u>Gene Name</u> | <u>Description</u>                                 | <u>Biotype</u> | <u>Where Found</u> | <u>Largest Tajima Value</u> | <u>Absolute Tajima</u> | <u>Selection Type</u> |
|--------------|-----------------|------------------|----------------------------------------------------|----------------|--------------------|-----------------------------|------------------------|-----------------------|
| PmUG01_06_v1 | PmUG01_06017800 | RPL4             | 60S ribosomal protein L4, putative                 | protein_coding | Both               | -2.54                       | 2.54                   | Directional           |
| PmUG01_06_v1 | PmUG01_06025500 |                  | Plasmodium exported protein, unknown function      | protein_coding | Both               | 2.52                        | 2.52                   | Balancing             |
| PmUG01_11_v1 | PmUG01_11044200 |                  | cell division cycle protein 48 homologue, putative | protein_coding | Exons              | -2.48                       | 2.48                   | Directional           |
| PmUG01_10_v1 | PmUG01_10054800 |                  | fam-I protein                                      | protein_coding | Both               | -2.47                       | 2.47                   | Directional           |
| PmUG01_11_v1 | PmUG01_11028200 | CCT4             | T-complex protein 1, delta subunit, putative       | protein_coding | Exons              | -2.47                       | 2.47                   | Directional           |
| PmUG01_11_v1 | PmUG01_11010600 |                  | Plasmodium exported protein, unknown function      | protein_coding | Both               | -2.46                       | 2.46                   | Directional           |
| PmUG01_13_v1 | PmUG01_13065600 |                  | Plasmodium exported protein,                       | protein_coding | Both               | -2.44                       | 2.44                   | Directional           |

|              |                 |      |                                                      |                |       |       |      |             |
|--------------|-----------------|------|------------------------------------------------------|----------------|-------|-------|------|-------------|
|              |                 |      | unknown function                                     |                |       |       |      |             |
| PmUG01_10_v1 | PmUG01_10046600 |      | hypothetical protein                                 | protein_coding | Both  | 2.44  | 2.44 | Balancing   |
| PmUG01_07_v1 | PmUG01_07012200 |      | STP1 protein                                         | protein_coding | Genes | 2.42  | 2.42 | Balancing   |
| PmUG01_07_v1 | PmUG01_07051600 |      | Plasmodium exported protein, unknown function        | protein_coding | Both  | -2.41 | 2.41 | Directional |
| PmUG01_11_v1 | PmUG01_11024100 |      | cytochrome c oxidase subunit ApiCOX24, putative      | protein_coding | Both  | -2.41 | 2.41 | Directional |
| PmUG01_12_v1 | PmUG01_12054200 | CYT1 | cytochrome c1, heme protein, mitochondrial, putative | protein_coding | Exons | -2.40 | 2.40 | Directional |
| PmUG01_14_v1 | PmUG01_14012400 |      | fam-m protein                                        | protein_coding | Both  | -2.38 | 2.38 | Directional |
| PmUG01_13_v1 | PmUG01_13066500 |      | Plasmodium exported protein, unknown function        | protein_coding | Both  | -2.38 | 2.38 | Directional |
| PmUG01_08_v1 | PmUG01_08061200 |      | STP1 protein                                         | protein_coding | Both  | -2.37 | 2.37 | Directional |
| PmUG01_07_v1 | PmUG01_07011200 |      | fam-l protein                                        | protein_coding | Exons | -2.37 | 2.37 | Directional |
| PmUG01_13_v1 | PmUG01_13012600 |      | dynein heavy chain, putative                         | protein_coding | Exons | 2.37  | 2.37 | Balancing   |

|              |                 |      |                                               |                |       |       |      |             |
|--------------|-----------------|------|-----------------------------------------------|----------------|-------|-------|------|-------------|
| PmUG01_03_v1 | PmUG01_03035500 |      | fam-m protein                                 | protein_coding | Both  | -2.37 | 2.37 | Directional |
| PmUG01_13_v1 | PmUG01_13067400 |      | fam-l protein                                 | protein_coding | Both  | -2.37 | 2.37 | Directional |
| PmUG01_08_v1 | PmUG01_08062600 |      | Plasmodium exported protein, unknown function | protein_coding | Both  | -2.35 | 2.35 | Directional |
| PmUG01_13_v1 | PmUG01_13061600 |      | fam-m protein                                 | protein_coding | Genes | -2.35 | 2.35 | Directional |
| PmUG01_10_v1 | PmUG01_10053100 |      | fam-m protein                                 | protein_coding | Both  | -2.35 | 2.35 | Directional |
| PmUG01_07_v1 | PmUG01_07017300 |      | TFIIS domain-containing protein               | protein_coding | Both  | 2.35  | 2.35 | Balancing   |
| PmUG01_03_v1 | PmUG01_03032200 |      | hypothetical protein                          | protein_coding | Both  | -2.34 | 2.34 | Directional |
| PmUG01_10_v1 | PmUG01_10053500 |      | fam-l protein                                 | protein_coding | Both  | -2.34 | 2.34 | Directional |
| PmUG01_12_v1 | PmUG01_12022300 | MyoA | myosin A, putative                            | protein_coding | Exons | -2.33 | 2.33 | Directional |
| PmUG01_13_v1 | PmUG01_13057500 |      | Plasmodium exported protein, unknown function | protein_coding | Both  | -2.32 | 2.32 | Directional |
| PmUG01_08_v1 | PmUG01_08011800 |      | fam-l protein                                 | protein_coding | Genes | -2.32 | 2.32 | Directional |
| PmUG01_14_v1 | PmUG01_14017600 |      | gamete antigen 27/25, putative                | protein_coding | Both  | -2.31 | 2.31 | Directional |
| PmUG01_13_v1 | PmUG01_13060300 |      | fam-m protein                                 | protein_coding | Both  | -2.30 | 2.30 | Directional |

|               |                 |  |                                               |                |      |       |      |             |
|---------------|-----------------|--|-----------------------------------------------|----------------|------|-------|------|-------------|
| PmUG01_1A4_v1 | PmUG01_14014500 |  | Plasmodium exported protein, unknown function | protein_coding | Both | -2.30 | 2.30 | Directional |
| PmUG01_08_v1  | PmUG01_08016300 |  | STP1 protein                                  | protein_coding | Both | -2.29 | 2.29 | Directional |
| PmUG01_07_v1  | PmUG01_07050700 |  | fam-I protein                                 | protein_coding | Both | -2.28 | 2.28 | Directional |
| PmUG01_05_v1  | PmUG01_05011100 |  | Plasmodium exported protein, unknown function | protein_coding | Both | -2.28 | 2.28 | Directional |
| PmUG01_05_v1  | PmUG01_05011000 |  | Plasmodium exported protein, unknown function | protein_coding | Both | -2.28 | 2.28 | Directional |
| PmUG01_11_v1  | PmUG01_11010900 |  | STP1 protein                                  | protein_coding | Both | -2.28 | 2.28 | Directional |
| PmUG01_07_v1  | PmUG01_07010200 |  | fam-I protein                                 | protein_coding | Both | -2.27 | 2.27 | Directional |
| PmUG01_08_v1  | PmUG01_08015400 |  | fam-I protein                                 | protein_coding | Both | -2.27 | 2.27 | Directional |
| PmUG01_13_v1  | PmUG01_13064400 |  | Plasmodium exported protein, unknown function | protein_coding | Both | -2.27 | 2.27 | Directional |
| PmUG01_14_v1  | PmUG01_14013800 |  | Plasmodium exported protein, unknown function | protein_coding | Both | -2.26 | 2.26 | Directional |

|              |                 |      |                                                               |                |       |       |      |             |
|--------------|-----------------|------|---------------------------------------------------------------|----------------|-------|-------|------|-------------|
| PmUG01_13_v1 | PmUG01_13061000 |      | fam-l protein                                                 | protein_coding | Both  | -2.25 | 2.25 | Directional |
| PmUG01_13_v1 | PmUG01_13060600 |      | fam-m protein                                                 | protein_coding | Genes | -2.25 | 2.25 | Directional |
| PmUG01_12_v1 | PmUG01_12062300 | 6PGD | 6-phosphoglucuronate dehydrogenase, decarboxylating, putative | protein_coding | Both  | -2.25 | 2.25 | Directional |
| PmUG01_03_v1 | PmUG01_03035700 |      | Plasmodium exported protein, unknown function                 | protein_coding | Both  | -2.25 | 2.25 | Directional |
| PmUG01_09_v1 | PmUG01_09010500 |      | fam-m protein                                                 | protein_coding | Both  | -2.24 | 2.24 | Directional |
| PmUG01_01_v1 | PmUG01_01011400 |      | fam-m protein                                                 | protein_coding | Both  | -2.24 | 2.24 | Directional |
| PmUG01_08_v1 | PmUG01_08014300 |      | fam-m protein                                                 | protein_coding | Both  | -2.24 | 2.24 | Directional |
| PmUG01_11_v1 | PmUG01_11012000 |      | fam-m protein                                                 | protein_coding | Both  | -2.24 | 2.24 | Directional |
| PmUG01_11_v1 | PmUG01_11012200 |      | fam-l protein                                                 | protein_coding | Both  | -2.24 | 2.24 | Directional |
| PmUG01_14_v1 | PmUG01_14010200 |      | Plasmodium exported protein, unknown function                 | protein_coding | Both  | -2.23 | 2.23 | Directional |
| PmUG01_05_v1 | PmUG01_05043400 |      | fam-l protein                                                 | protein_coding | Genes | -2.23 | 2.23 | Directional |
| PmUG01_01_v1 | PmUG01_01034800 |      | fam-l protein                                                 | protein_coding | Both  | -2.23 | 2.23 | Directional |

|              |                 |  |                                               |                |       |       |      |             |
|--------------|-----------------|--|-----------------------------------------------|----------------|-------|-------|------|-------------|
| PmUG01_13_v1 | PmUG01_13062700 |  | fam-m protein                                 | protein_coding | Both  | -2.22 | 2.22 | Directional |
| PmUG01_05_v1 | PmUG01_05043300 |  | fam-l protein                                 | protein_coding | Both  | -2.22 | 2.22 | Directional |
| PmUG01_13_v1 | PmUG01_13064800 |  | fam-m protein                                 | protein_coding | Genes | -2.22 | 2.22 | Directional |
| PmUG01_05_v1 | PmUG01_05045000 |  | fam-m protein                                 | protein_coding | Both  | -2.22 | 2.22 | Directional |
| PmUG01_13_v1 | PmUG01_13060000 |  | fam-m protein                                 | protein_coding | Exons | -2.22 | 2.22 | Directional |
| PmUG01_10_v1 | PmUG01_10020700 |  | MerC domain-containing protein, putative      | protein_coding | Exons | 2.21  | 2.21 | Balancing   |
| PmUG01_08_v1 | PmUG01_08013700 |  | fam-m protein                                 | protein_coding | Genes | -2.21 | 2.21 | Directional |
| PmUG01_09_v1 | PmUG01_09010300 |  | Plasmodium exported protein, unknown function | protein_coding | Both  | -2.21 | 2.21 | Directional |
| PmUG01_14_v1 | PmUG01_14011200 |  | fam-m protein                                 | protein_coding | Exons | -2.20 | 2.20 | Directional |
| PmUG01_11_v1 | PmUG01_11013900 |  | fam-l protein                                 | protein_coding | Both  | -2.20 | 2.20 | Directional |
| PmUG01_08_v1 | PmUG01_08014000 |  | fam-l protein                                 | protein_coding | Genes | -2.19 | 2.19 | Directional |
| PmUG01_03_v1 | PmUG01_03035400 |  | fam-l protein                                 | protein_coding | Both  | -2.18 | 2.18 | Directional |
| PmUG01_10_v1 | PmUG01_10054600 |  | Plasmodium exported protein, unknown function | protein_coding | Exons | -2.18 | 2.18 | Directional |

|              |                 |     |                                               |                |       |       |      |             |
|--------------|-----------------|-----|-----------------------------------------------|----------------|-------|-------|------|-------------|
| PmUG01_03_v1 | PmUG01_03035100 |     | fam-l protein                                 | protein_coding | Exons | -2.18 | 2.18 | Directional |
| PmUG01_13_v1 | PmUG01_13064600 |     | fam-l protein                                 | protein_coding | Exons | -2.17 | 2.17 | Directional |
| PmUG01_07_v1 | PmUG01_07010800 |     | fam-l protein                                 | protein_coding | Exons | -2.16 | 2.16 | Directional |
| PmUG01_01_v1 | PmUG01_01031000 |     | Plasmodium exported protein, unknown function | protein_coding | Exons | -2.16 | 2.16 | Directional |
| PmUG01_08_v1 | PmUG01_08060200 |     | Plasmodium exported protein, unknown function | protein_coding | Exons | -2.16 | 2.16 | Directional |
| PmUG01_08_v1 | PmUG01_08062900 |     | fam-l protein                                 | protein_coding | Exons | -2.15 | 2.15 | Directional |
| PmUG01_05_v1 | PmUG01_05021600 | NT2 | nucleoside transporter 2, putative            | protein_coding | Exons | -2.15 | 2.15 | Directional |
| PmUG01_04_v1 | PmUG01_04011200 |     | fam-m protein                                 | protein_coding | Exons | -2.15 | 2.15 | Directional |
| PmUG01_14_v1 | PmUG01_14011600 |     | fam-l protein                                 | protein_coding | Exons | -2.15 | 2.15 | Directional |
| PmUG01_07_v1 | PmUG01_07010700 |     | fam-m protein                                 | protein_coding | Exons | -2.15 | 2.15 | Directional |
| PmUG01_08_v1 | PmUG01_08060600 |     | fam-m protein                                 | protein_coding | Exons | -2.15 | 2.15 | Directional |
| PmUG01_08_v1 | PmUG01_08013100 |     | Plasmodium exported protein, unknown function | protein_coding | Exons | -2.14 | 2.14 | Directional |
| PmUG01_13_v1 | PmUG01_13058600 |     | Plasmodium exported                           | protein_coding | Exons | -2.14 | 2.14 | Directional |

|              |                 |  |                                                           |                    |       |       |      |             |
|--------------|-----------------|--|-----------------------------------------------------------|--------------------|-------|-------|------|-------------|
|              |                 |  | protein,<br>unknown<br>function                           |                    |       |       |      |             |
| PmUG01_08_v1 | PmUG01_08012600 |  | fam-l protein                                             | protein_<br>coding | Exons | -2.14 | 2.14 | Directional |
| PmUG01_07_v1 | PmUG01_07010500 |  | fam-m<br>protein                                          | protein_<br>coding | Exons | -2.14 | 2.14 | Directional |
| PmUG01_09_v1 | PmUG01_09011200 |  | Plasmodium<br>exported<br>protein,<br>unknown<br>function | protein_<br>coding | Exons | -2.14 | 2.14 | Directional |
| PmUG01_05_v1 | PmUG01_05042500 |  | Plasmodium<br>exported<br>protein,<br>unknown<br>function | protein_<br>coding | Exons | -2.14 | 2.14 | Directional |
| PmUG01_11_v1 | PmUG01_11013500 |  | Plasmodium<br>exported<br>protein,<br>unknown<br>function | protein_<br>coding | Exons | -2.13 | 2.13 | Directional |

**Supplemental Table 4 – Genome-wide  $nS_L$  top hits with a minor allele frequency cutoff of 0.05 applied**

| <u>CHROM</u> | <u>Gene ID</u>  | <u>Gene Name</u> | <u>Description</u>                                     | <u>Biotype</u> | <u>Largest <math>nS_L</math> Value</u> | <u>Absolute <math>nS_L</math></u> |
|--------------|-----------------|------------------|--------------------------------------------------------|----------------|----------------------------------------|-----------------------------------|
| PmUG01_01_v1 | PmUG01_01011800 |                  | fam-I protein                                          | protein_coding | -2.95                                  | 2.95                              |
| PmUG01_01_v1 | PmUG01_01012600 |                  | STP1 protein                                           | protein_coding | 3.00                                   | 3.00                              |
| PmUG01_01_v1 | PmUG01_01028700 |                  | filament assembling protein, putative                  | protein_coding | 3.13                                   | 3.13                              |
| PmUG01_01_v1 | PmUG01_01028800 | UTP14            | U3 small nucleolar RNA-associated protein 14, putative | protein_coding | 2.86                                   | 2.86                              |
| PmUG01_01_v1 | PmUG01_01029300 | ACbeta           | adenylyl cyclase beta, putative                        | protein_coding | 3.10                                   | 3.10                              |
| PmUG01_01_v1 | PmUG01_01034500 |                  | Plasmodium exported protein, unknown function          | protein_coding | -3.40                                  | 3.40                              |
| PmUG01_05_v1 | PmUG01_05011800 |                  | fam-I protein                                          | protein_coding | 2.80                                   | 2.80                              |
| PmUG01_05_v1 | PmUG01_05016400 | ETRAMP           | early transcribed membrane protein                     | protein_coding | 2.70                                   | 2.70                              |
| PmUG01_05_v1 | PmUG01_05026000 |                  | RNA-binding protein, putative                          | protein_coding | 2.81                                   | 2.81                              |
| PmUG01_05_v1 | PmUG01_05026600 |                  | conserved protein,                                     | protein_coding | 2.72                                   | 2.72                              |

|              |                 |       |                                                       |                |      |      |
|--------------|-----------------|-------|-------------------------------------------------------|----------------|------|------|
|              |                 |       | unknown function                                      |                |      |      |
| PmUG01_05_v1 | PmUG01_05027600 |       | Plasmodium exported protein (PHIST), unknown function | protein_coding | 3.83 | 3.83 |
| PmUG01_05_v1 | PmUG01_05029000 |       | GTP-binding protein, putative                         | protein_coding | 3.51 | 3.51 |
| PmUG01_05_v1 | PmUG01_05032900 | CZIF2 | C3H1-type zinc finger protein CZIF2, putative         | protein_coding | 3.05 | 3.05 |
| PmUG01_05_v1 | PmUG01_05034400 |       | conserved Plasmodium protein, unknown function        | protein_coding | 2.69 | 2.69 |
| PmUG01_05_v1 | PmUG01_05034900 |       | conserved Plasmodium protein, unknown function        | protein_coding | 2.81 | 2.81 |
| PmUG01_05_v1 | PmUG01_05035500 |       | conserved Plasmodium protein, unknown function        | protein_coding | 2.82 | 2.82 |
| PmUG01_05_v1 | PmUG01_05039800 |       | BSD-domain protein, putative                          | protein_coding | 2.88 | 2.88 |
| PmUG01_08_v1 | PmUG01_08033400 |       | conserved Plasmodium                                  | protein_coding | 2.79 | 2.79 |

|              |                 |        |                                                                                               |                    |       |      |
|--------------|-----------------|--------|-----------------------------------------------------------------------------------------------|--------------------|-------|------|
|              |                 |        | protein,<br>unknown<br>function                                                               |                    |       |      |
| PmUG01_08_v1 | PmUG01_08038400 |        | CPSF<br>(cleavage<br>and<br>polyadenylation<br>specific<br>factor),<br>subunit A,<br>putative | protein_<br>coding | 2.72  | 2.72 |
| PmUG01_08_v1 | PmUG01_08039200 |        | E3<br>ubiquitin-pro<br>tein ligase,<br>putative                                               | protein_<br>coding | 3.06  | 3.06 |
| PmUG01_08_v1 | PmUG01_08042600 |        | conserved<br>Plasmodium<br>protein,<br>unknown<br>function                                    | protein_<br>coding | 3.24  | 3.24 |
| PmUG01_08_v1 | PmUG01_08048500 | AKIT10 | apicomplex<br>an<br>kinetochore<br>protein 10,<br>putative                                    | protein_<br>coding | 2.78  | 2.78 |
| PmUG01_08_v1 | PmUG01_08050100 |        | conserved<br>Plasmodium<br>protein,<br>unknown<br>function                                    | protein_<br>coding | 2.84  | 2.84 |
| PmUG01_09_v1 | PmUG01_09010500 |        | fam-m<br>protein                                                                              | protein_<br>coding | -2.91 | 2.91 |
| PmUG01_09_v1 | PmUG01_09010600 |        | Plasmodium<br>exported<br>protein,                                                            | protein_<br>coding | -2.91 | 2.91 |

|              |                 |  |                                                   |                |       |      |
|--------------|-----------------|--|---------------------------------------------------|----------------|-------|------|
|              |                 |  | unknown function                                  |                |       |      |
| PmUG01_10_v1 | PmUG01_10037200 |  | conserved protein, unknown function               | protein_coding | 2.83  | 2.83 |
| PmUG01_10_v1 | PmUG01_10038200 |  | conserved Plasmodium protein, unknown function    | protein_coding | 3.04  | 3.04 |
| PmUG01_10_v1 | PmUG01_10046700 |  | merozoite surface protein, putative               | protein_coding | 2.73  | 2.73 |
| PmUG01_10_v1 | PmUG01_10053800 |  | Plasmodium exported protein, unknown function     | protein_coding | -3.04 | 3.04 |
| PmUG01_11_v1 | PmUG01_11012100 |  | fam-I protein                                     | protein_coding | -2.91 | 2.91 |
| PmUG01_14_v1 | PmUG01_14076000 |  | rab specific GDP dissociation inhibitor, putative | protein_coding | 3.02  | 3.02 |

**Supplemental Table 5 – Genome-wide  $nS_L$  top hits in *P. malariae* with no minor allele frequency cutoff applied**

| <u>CHROM</u> | <u>Gene ID</u>  | <u>Gene Name</u> | <u>Description</u>                                               | <u>Biotype</u> | <u>Largest <math>nS_L</math> Value</u> | <u>Absolute <math>nS_L</math></u> |
|--------------|-----------------|------------------|------------------------------------------------------------------|----------------|----------------------------------------|-----------------------------------|
| PmUG01_01_v1 | PmUG01_01010200 |                  | fam-m protein                                                    | protein_coding | -4.51                                  | 4.51                              |
| PmUG01_01_v1 | PmUG01_01011800 |                  | fam-l protein                                                    | protein_coding | -5.14                                  | 5.14                              |
| PmUG01_01_v1 | PmUG01_01012600 |                  | STP1 protein                                                     | protein_coding | 3.52                                   | 3.52                              |
| PmUG01_01_v1 | PmUG01_01021000 | MED14            | mediator of RNA polymerase II transcription subunit 14, putative | protein_coding | 3.17                                   | 3.17                              |
| PmUG01_01_v1 | PmUG01_01021800 |                  | Sfi1-like protein SLP, putative                                  | protein_coding | -4.09                                  | 4.09                              |
| PmUG01_01_v1 | PmUG01_01026700 |                  | zinc finger protein, putative                                    | protein_coding | -3.65                                  | 3.65                              |
| PmUG01_01_v1 | PmUG01_01028700 |                  | filament assembling protein, putative                            | protein_coding | -4.16                                  | 4.16                              |
| PmUG01_01_v1 | PmUG01_01033700 |                  | fam-l protein                                                    | protein_coding | 3.75                                   | 3.75                              |
| PmUG01_01_v1 | PmUG01_01034500 |                  | Plasmodium exported protein, unknown function                    | protein_coding | -4.18                                  | 4.18                              |
| PmUG01_02_v1 | PmUG01_02015100 |                  | mitochondrial carrier                                            | protein_coding | -3.21                                  | 3.21                              |

|              |                 |        |                                                                          |                    |       |      |
|--------------|-----------------|--------|--------------------------------------------------------------------------|--------------------|-------|------|
|              |                 |        | protein,<br>putative                                                     |                    |       |      |
| PmUG01_02_v1 | PmUG01_02015200 | PSOP24 | secreted<br>ookinete<br>protein,<br>putative                             | protein_<br>coding | -3.50 | 3.50 |
| PmUG01_02_v1 | PmUG01_02020500 | VPS51  | vacuolar<br>protein<br>sorting-asso<br>ciated<br>protein 51,<br>putative | protein_<br>coding | 5.19  | 5.19 |
| PmUG01_02_v1 | PmUG01_02020700 |        | aspartyl-tRN<br>A<br>synthetase,<br>putative                             | protein_<br>coding | 3.62  | 3.62 |
| PmUG01_02_v1 | PmUG01_02021000 |        | conserved<br>Plasmodium<br>membrane<br>protein,<br>unknown<br>function   | protein_<br>coding | -3.35 | 3.35 |
| PmUG01_03_v1 | PmUG01_03031000 |        | protein<br>kinase,<br>putative                                           | protein_<br>coding | 3.25  | 3.25 |
| PmUG01_03_v1 | PmUG01_03033700 |        | fam-I protein                                                            | protein_<br>coding | -3.26 | 3.26 |
| PmUG01_03_v1 | PmUG01_03035400 |        | fam-I protein                                                            | protein_<br>coding | -3.14 | 3.14 |
| PmUG01_03_v1 | PmUG01_03035700 |        | Plasmodium<br>exported<br>protein,<br>unknown<br>function                | protein_<br>coding | -3.45 | 3.45 |
| PmUG01_03_v1 | PmUG01_03035900 |        | fam-m<br>protein                                                         | protein_<br>coding | -3.30 | 3.30 |

|              |                 |      |                                                |                |       |      |
|--------------|-----------------|------|------------------------------------------------|----------------|-------|------|
| PmUG01_04_v1 | PmUG01_04011300 |      | STP1 protein                                   | protein_coding | -3.25 | 3.25 |
| PmUG01_04_v1 | PmUG01_04017400 | RON6 | rhoptry neck protein 6, putative               | protein_coding | -3.30 | 3.30 |
| PmUG01_04_v1 | PmUG01_04018700 |      | conserved Plasmodium protein, unknown function | protein_coding | -4.12 | 4.12 |
| PmUG01_04_v1 | PmUG01_04024600 |      | serine-repeat antigen, putative                | protein_coding | -3.12 | 3.12 |
| PmUG01_04_v1 | PmUG01_04026400 | RAD2 | DNA repair protein RAD2, putative              | protein_coding | -3.14 | 3.14 |
| PmUG01_05_v1 | PmUG01_05010700 |      | fam-I protein                                  | protein_coding | -4.02 | 4.02 |
| PmUG01_05_v1 | PmUG01_05011100 |      | Plasmodium exported protein, unknown function  | protein_coding | -3.80 | 3.80 |
| PmUG01_05_v1 | PmUG01_05011800 |      | fam-I protein                                  | protein_coding | 4.12  | 4.12 |
| PmUG01_05_v1 | PmUG01_05016500 |      | conserved Plasmodium protein, unknown function | protein_coding | -3.68 | 3.68 |
| PmUG01_05_v1 | PmUG01_05018100 | PDI8 | protein disulfide-isomerase, putative          | protein_coding | -3.82 | 3.82 |

|              |                 |      |                                                       |                |       |      |
|--------------|-----------------|------|-------------------------------------------------------|----------------|-------|------|
| PmUG01_05_v1 | PmUG01_05018800 |      | conserved Plasmodium protein, unknown function        | protein_coding | -3.80 | 3.80 |
| PmUG01_05_v1 | PmUG01_05019400 |      | SNARE protein, putative                               | protein_coding | -3.26 | 3.26 |
| PmUG01_05_v1 | PmUG01_05021600 | NT2  | nucleoside transporter 2, putative                    | protein_coding | -3.53 | 3.53 |
| PmUG01_05_v1 | PmUG01_05027600 |      | Plasmodium exported protein (PHIST), unknown function | protein_coding | -3.73 | 3.73 |
| PmUG01_05_v1 | PmUG01_05027700 |      | RNA-binding protein, putative                         | protein_coding | -3.69 | 3.69 |
| PmUG01_05_v1 | PmUG01_05030200 | PGM2 | phosphoglucosyltransferase-2, putative                | protein_coding | -3.17 | 3.17 |
| PmUG01_05_v1 | PmUG01_05030600 | Ub   | ubiquitin, putative                                   | protein_coding | -3.76 | 3.76 |
| PmUG01_05_v1 | PmUG01_05035200 |      | conserved Plasmodium protein, unknown function        | protein_coding | -3.35 | 3.35 |
| PmUG01_05_v1 | PmUG01_05036800 |      | conserved Plasmodium protein, unknown function        | protein_coding | -3.97 | 3.97 |

|              |                 |       |                                                |                |       |      |
|--------------|-----------------|-------|------------------------------------------------|----------------|-------|------|
| PmUG01_05_v1 | PmUG01_05043300 |       | fam-I protein                                  | protein_coding | -4.43 | 4.43 |
| PmUG01_05_v1 | PmUG01_05043700 |       | fam-I protein                                  | protein_coding | -3.65 | 3.65 |
| PmUG01_05_v1 | PmUG01_05044200 |       | fam-m protein                                  | protein_coding | -3.90 | 3.90 |
| PmUG01_05_v1 | PmUG01_05044900 |       | fam-I protein                                  | protein_coding | -4.20 | 4.20 |
| PmUG01_05_v1 | PmUG01_05045000 |       | fam-m protein                                  | protein_coding | -4.22 | 4.22 |
| PmUG01_06_v1 | PmUG01_06013000 | DPA   | deoxyribose-phosphate aldolase, putative       | protein_coding | -4.01 | 4.01 |
| PmUG01_06_v1 | PmUG01_06016800 | SET9  | SET domain protein, putative                   | protein_coding | 3.28  | 3.28 |
| PmUG01_06_v1 | PmUG01_06020600 |       | conserved Plasmodium protein, unknown function | protein_coding | -3.89 | 3.89 |
| PmUG01_06_v1 | PmUG01_06021600 |       | merozoite surface protein 3, putative          | protein_coding | -3.48 | 3.48 |
| PmUG01_06_v1 | PmUG01_06021900 |       | merozoite surface protein 3, putative          | protein_coding | 3.88  | 3.88 |
| PmUG01_06_v1 | PmUG01_06022900 |       | merozoite surface protein 3, putative          | protein_coding | 4.00  | 4.00 |
| PmUG01_06_v1 | PmUG01_06024300 | VPS11 | vacuolar protein                               | protein_coding | -3.84 | 3.84 |

|              |                 |  |                                               |                |       |      |
|--------------|-----------------|--|-----------------------------------------------|----------------|-------|------|
|              |                 |  | sorting-associated protein 11, putative       |                |       |      |
| PmUG01_06_v1 | PmUG01_06025600 |  | Plasmodium exported protein, unknown function | protein_coding | -3.50 | 3.50 |
| PmUG01_07_v1 | PmUG01_07010800 |  | fam-l protein                                 | protein_coding | -3.54 | 3.54 |
| PmUG01_07_v1 | PmUG01_07011200 |  | fam-l protein                                 | protein_coding | -3.55 | 3.55 |
| PmUG01_07_v1 | PmUG01_07011300 |  | fam-l protein                                 | protein_coding | -3.44 | 3.44 |
| PmUG01_07_v1 | PmUG01_07012200 |  | STP1 protein                                  | protein_coding | -3.13 | 3.13 |
| PmUG01_07_v1 | PmUG01_07050800 |  | fam-m protein                                 | protein_coding | -3.60 | 3.60 |
| PmUG01_07_v1 | PmUG01_07051400 |  | fam-l protein                                 | protein_coding | -3.60 | 3.60 |
| PmUG01_07_v1 | PmUG01_07051600 |  | Plasmodium exported protein, unknown function | protein_coding | -3.56 | 3.56 |
| PmUG01_08_v1 | PmUG01_08011700 |  | fam-m protein                                 | protein_coding | -3.57 | 3.57 |
| PmUG01_08_v1 | PmUG01_08011800 |  | fam-l protein                                 | protein_coding | -3.75 | 3.75 |
| PmUG01_08_v1 | PmUG01_08012800 |  | fam-l protein                                 | protein_coding | -3.54 | 3.54 |
| PmUG01_08_v1 | PmUG01_08013700 |  | fam-m protein                                 | protein_coding | -3.58 | 3.58 |
| PmUG01_08_v1 | PmUG01_08014000 |  | fam-l protein                                 | protein_coding | -3.53 | 3.53 |

|              |                 |  |                                                |                |       |      |
|--------------|-----------------|--|------------------------------------------------|----------------|-------|------|
| PmUG01_08_v1 | PmUG01_08014300 |  | fam-m protein                                  | protein_coding | -4.08 | 4.08 |
| PmUG01_08_v1 | PmUG01_08015400 |  | fam-l protein                                  | protein_coding | -3.67 | 3.67 |
| PmUG01_08_v1 | PmUG01_08044900 |  | phosphatidylinositol 3- and 4-kinase, putative | protein_coding | 3.14  | 3.14 |
| PmUG01_08_v1 | PmUG01_08046900 |  | N2227-like protein, putative                   | protein_coding | 3.31  | 3.31 |
| PmUG01_08_v1 | PmUG01_08056400 |  | Plasmodium exported protein, unknown function  | protein_coding | -3.14 | 3.14 |
| PmUG01_08_v1 | PmUG01_08057000 |  | fam-m protein                                  | protein_coding | -3.67 | 3.67 |
| PmUG01_08_v1 | PmUG01_08057700 |  | fam-l protein                                  | protein_coding | -3.62 | 3.62 |
| PmUG01_08_v1 | PmUG01_08060200 |  | Plasmodium exported protein, unknown function  | protein_coding | -3.16 | 3.16 |
| PmUG01_08_v1 | PmUG01_08060500 |  | fam-l protein                                  | protein_coding | -3.25 | 3.25 |
| PmUG01_08_v1 | PmUG01_08060800 |  | fam-l protein                                  | protein_coding | -3.61 | 3.61 |
| PmUG01_08_v1 | PmUG01_08062600 |  | Plasmodium exported protein, unknown function  | protein_coding | -3.27 | 3.27 |

|              |                 |       |                                                |                |       |      |
|--------------|-----------------|-------|------------------------------------------------|----------------|-------|------|
| PmUG01_08_v1 | PmUG01_08062900 |       | fam-I protein                                  | protein_coding | -3.53 | 3.53 |
| PmUG01_08_v1 | PmUG01_08063800 |       | fam-I protein                                  | protein_coding | -3.12 | 3.12 |
| PmUG01_09_v1 | PmUG01_09010300 |       | Plasmodium exported protein, unknown function  | protein_coding | -3.77 | 3.77 |
| PmUG01_09_v1 | PmUG01_09010600 |       | Plasmodium exported protein, unknown function  | protein_coding | -3.91 | 3.91 |
| PmUG01_09_v1 | PmUG01_09025200 | DHHC9 | palmitoyltransferase DHHC9, putative           | protein_coding | -4.16 | 4.16 |
| PmUG01_09_v1 | PmUG01_09031700 |       | protein KIC10, putative                        | protein_coding | -3.41 | 3.41 |
| PmUG01_09_v1 | PmUG01_09052600 |       | regulator of chromosome condensation, putative | protein_coding | -4.25 | 4.25 |
| PmUG01_09_v1 | PmUG01_09055000 | RSA4  | ribosome assembly protein 4, putative          | protein_coding | -3.96 | 3.96 |
| PmUG01_10_v1 | PmUG01_10013600 | FRM1  | formin 1, putative                             | protein_coding | 3.46  | 3.46 |
| PmUG01_10_v1 | PmUG01_10019600 | TYW1  | S-adenosyl-L-methionine-dependent tRNA         | protein_coding | -3.14 | 3.14 |

|              |                 |  |                                                            |                    |       |      |
|--------------|-----------------|--|------------------------------------------------------------|--------------------|-------|------|
|              |                 |  | 4-demethyl<br>wyosine<br>synthase,<br>putative             |                    |       |      |
| PmUG01_10_v1 | PmUG01_10040200 |  | conserved<br>Plasmodium<br>protein,<br>unknown<br>function | protein_<br>coding | -3.15 | 3.15 |
| PmUG01_10_v1 | PmUG01_10046700 |  | merozoite<br>surface<br>protein,<br>putative               | protein_<br>coding | 3.25  | 3.25 |
| PmUG01_10_v1 | PmUG01_10053100 |  | fam-m<br>protein                                           | protein_<br>coding | -4.22 | 4.22 |
| PmUG01_10_v1 | PmUG01_10053800 |  | Plasmodium<br>exported<br>protein,<br>unknown<br>function  | protein_<br>coding | -3.45 | 3.45 |
| PmUG01_10_v1 | PmUG01_10054000 |  | Plasmodium<br>exported<br>protein,<br>unknown<br>function  | protein_<br>coding | -3.97 | 3.97 |
| PmUG01_10_v1 | PmUG01_10054500 |  | Plasmodium<br>exported<br>protein,<br>unknown<br>function  | protein_<br>coding | -3.21 | 3.21 |
| PmUG01_10_v1 | PmUG01_10054800 |  | fam-l protein                                              | protein_<br>coding | -3.62 | 3.62 |
| PmUG01_10_v1 | PmUG01_10054900 |  | fam-m<br>protein                                           | protein_<br>coding | -3.23 | 3.23 |
| PmUG01_11_v1 | PmUG01_11012100 |  | fam-l protein                                              | protein_<br>coding | -3.36 | 3.36 |

|              |                 |         |                                                          |                |       |      |
|--------------|-----------------|---------|----------------------------------------------------------|----------------|-------|------|
| PmUG01_11_v1 | PmUG01_11013600 |         | fam-I protein                                            | protein_coding | -3.60 | 3.60 |
| PmUG01_11_v1 | PmUG01_11053000 |         | tetratricopeptide repeat protein, putative               | protein_coding | -3.21 | 3.21 |
| PmUG01_11_v1 | PmUG01_11056900 |         | elongation of fatty acids protein, putative              | protein_coding | 3.40  | 3.40 |
| PmUG01_12_v1 | PmUG01_12010600 |         | Plasmodium exported protein, unknown function            | protein_coding | -3.25 | 3.25 |
| PmUG01_12_v1 | PmUG01_12016600 |         | elongation factor Tu, putative                           | protein_coding | -3.32 | 3.32 |
| PmUG01_12_v1 | PmUG01_12019900 |         | RING zinc finger protein, putative                       | protein_coding | -3.94 | 3.94 |
| PmUG01_12_v1 | PmUG01_12020600 |         | zinc finger protein, putative                            | protein_coding | -3.91 | 3.91 |
| PmUG01_12_v1 | PmUG01_12030200 |         | MSP7-like protein, putative                              | protein_coding | 3.37  | 3.37 |
| PmUG01_12_v1 | PmUG01_12032300 | TRAPPC2 | trafficking protein particle complex subunit 2, putative | protein_coding | 3.24  | 3.24 |

|              |                 |      |                                                                    |                    |       |      |
|--------------|-----------------|------|--------------------------------------------------------------------|--------------------|-------|------|
| PmUG01_12_v1 | PmUG01_12033500 |      | helicase,<br>putative                                              | protein_<br>coding | -3.99 | 3.99 |
| PmUG01_12_v1 | PmUG01_12044800 | YIP1 | protein<br>transport<br>protein<br>YIP1,<br>putative               | protein_<br>coding | -3.81 | 3.81 |
| PmUG01_12_v1 | PmUG01_12048900 |      | WD<br>repeat-cont<br>aining<br>protein,<br>putative                | protein_<br>coding | -4.09 | 4.09 |
| PmUG01_12_v1 | PmUG01_12054300 |      | conserved<br>Plasmodium<br>protein,<br>unknown<br>function         | protein_<br>coding | -3.89 | 3.89 |
| PmUG01_12_v1 | PmUG01_12055100 |      | conserved<br>Plasmodium<br>protein,<br>unknown<br>function         | protein_<br>coding | -3.55 | 3.55 |
| PmUG01_12_v1 | PmUG01_12058600 |      | alpha/beta<br>hydrolase,<br>putative                               | protein_<br>coding | -4.06 | 4.06 |
| PmUG01_12_v1 | PmUG01_12062500 | ISCU | iron-sulfur<br>cluster<br>assembly<br>protein<br>ISCU,<br>putative | protein_<br>coding | 3.16  | 3.16 |
| PmUG01_12_v1 | PmUG01_12062600 | APP  | aminopeptid<br>ase P,<br>putative                                  | protein_<br>coding | 3.36  | 3.36 |
| PmUG01_12_v1 | PmUG01_12069200 |      | calponin<br>homology                                               | protein_<br>coding | -3.91 | 3.91 |

|              |                 |        |                                                          |                |       |      |
|--------------|-----------------|--------|----------------------------------------------------------|----------------|-------|------|
|              |                 |        | domain-containing protein, putative                      |                |       |      |
| PmUG01_12_v1 | PmUG01_12079700 |        | proteasome subunit alpha type-1, putative                | protein_coding | -3.71 | 3.71 |
| PmUG01_13_v1 | PmUG01_13016100 | ISN1   | IMP-specific 5'-nucleotidase 1, putative                 | protein_coding | -3.17 | 3.17 |
| PmUG01_13_v1 | PmUG01_13051300 | RlmN   | radical SAM protein, putative                            | protein_coding | -3.28 | 3.28 |
| PmUG01_13_v1 | PmUG01_13053100 | BET5   | trafficking protein particle complex subunit 1, putative | protein_coding | -3.22 | 3.22 |
| PmUG01_13_v1 | PmUG01_13054500 | MISFIT | nuclear formin-like protein MISFIT, putative             | protein_coding | -3.29 | 3.29 |
| PmUG01_13_v1 | PmUG01_13054900 |        | dynein regulatory complex protein, putative              | protein_coding | -3.34 | 3.34 |
| PmUG01_13_v1 | PmUG01_13055800 |        | ribosomal protein S27a, putative                         | protein_coding | -3.23 | 3.23 |

|              |                 |  |                                               |                |       |      |
|--------------|-----------------|--|-----------------------------------------------|----------------|-------|------|
| PmUG01_13_v1 | PmUG01_13057500 |  | Plasmodium exported protein, unknown function | protein_coding | -3.59 | 3.59 |
| PmUG01_13_v1 | PmUG01_13058800 |  | Plasmodium exported protein, unknown function | protein_coding | -3.66 | 3.66 |
| PmUG01_13_v1 | PmUG01_13059600 |  | fam-m protein                                 | protein_coding | -3.45 | 3.45 |
| PmUG01_13_v1 | PmUG01_13062700 |  | fam-m protein                                 | protein_coding | -3.72 | 3.72 |
| PmUG01_13_v1 | PmUG01_13064400 |  | Plasmodium exported protein, unknown function | protein_coding | -3.62 | 3.62 |
| PmUG01_13_v1 | PmUG01_13064600 |  | fam-l protein                                 | protein_coding | -3.30 | 3.30 |
| PmUG01_13_v1 | PmUG01_13064700 |  | fam-l protein                                 | protein_coding | -3.41 | 3.41 |
| PmUG01_13_v1 | PmUG01_13064800 |  | fam-m protein                                 | protein_coding | -3.63 | 3.63 |
| PmUG01_13_v1 | PmUG01_13068500 |  | fam-m protein                                 | protein_coding | -3.39 | 3.39 |
| PmUG01_14_v1 | PmUG01_14011600 |  | fam-l protein                                 | protein_coding | -3.41 | 3.41 |
| PmUG01_14_v1 | PmUG01_14012600 |  | fam-m protein                                 | protein_coding | -3.42 | 3.42 |
| PmUG01_14_v1 | PmUG01_14013100 |  | fam-m protein                                 | protein_coding | -3.59 | 3.59 |
| PmUG01_14_v1 | PmUG01_14013400 |  | fam-m protein                                 | protein_coding | -3.28 | 3.28 |

|              |                 |       |                                                   |                |       |      |
|--------------|-----------------|-------|---------------------------------------------------|----------------|-------|------|
| PmUG01_14_v1 | PmUG01_14024900 |       | carbamoyl phosphate synthetase, putative          | protein_coding | -3.37 | 3.37 |
| PmUG01_14_v1 | PmUG01_14036100 |       | conserved protein, unknown function               | protein_coding | -3.14 | 3.14 |
| PmUG01_14_v1 | PmUG01_14036300 |       | female development protein FD3, putative          | protein_coding | -3.31 | 3.31 |
| PmUG01_14_v1 | PmUG01_14051900 | TOP6A | meiotic recombination protein SPO11, putative     | protein_coding | -3.37 | 3.37 |
| PmUG01_14_v1 | PmUG01_14076000 |       | rab specific GDP dissociation inhibitor, putative | protein_coding | 3.45  | 3.45 |
| PmUG01_14_v1 | PmUG01_14078500 | UBC12 | NEDD8-conjugating enzyme UBC12, putative          | protein_coding | -3.41 | 3.41 |
